# Supplementary material
Source: MDPI journal article supplement (https://www.mdpi.com/2071-1050/7/6/7833)
Supplement: s1 [file s1]

## Supplementary Information

# What Is Sustainable Agriculture? A Systematic Review.

## *Sustainability* 2015, 7, 7833–7865

Sarah Velten \*, Julia Leventon, Nicolas Jager and Jens Newig

Institute for Sustainability Communication, Leuphana University Lüneburg, Scharnhorststr. 1, Lüneburg 21335, Germany; E-Mails: julia.leventon@leuphana.de (J.L.); nicolas.jager@leuphana.de (N.J.); jens.newig@leuphana.de (J.N.)

\* Author to whom correspondence should be addressed; E-Mail: sarah.velten@leuphana.de; Tel.: +49-4131-677-1582.

Received: 5 March 2015 / Accepted: 10 June 2015 / Published:

**Table S1.** List of analyzed publications.

| Reference                                                                                                                                                                                                             | Focus        | Discipline      |
|-----------------------------------------------------------------------------------------------------------------------------------------------------------------------------------------------------------------------|--------------|-----------------|
| <i>Journal Articles</i>                                                                                                                                                                                               |              |                 |
| Abelson, P.H. Sustainable Agriculture and the 1995 Farm Bill. <i>Science</i> <b>1995</b> , 267, 943.                                                                                                                  | food system  | eng. & nat. sc. |
| Afrous, A.; Abdollahzadeh, G. Assessing factors affecting on sustainability of agriculture a case of Dezful County, southwest Iran. <i>Aust. J. Basic Appl. Sci.</i> <b>2011</b> , 5, 1444–1449.                      | production   | eng. & nat. sc. |
| Aikanathan, S.; Chenayah, S.; Sasekumar, A. Sustainable agriculture: A case study on the palm oil industry. <i>Malays. J. Sci.</i> <b>2011</b> , 30, 66–75.                                                           | supply chain | econ.           |
| Aldy, J.E.; Hrubovcak, J.; Vasavada, U. The role of technology in sustaining agriculture and the environment. <i>Ecol. Econ.</i> <b>1998</b> , 26, 81–96.                                                             | production   | econ.           |
| Allahyari, M. Extensionists' Attitude Toward Sustainable Agriculture in Iran. <i>J. Appl. Sci.</i> <b>2008</b> , 8, 3761–3763.                                                                                        | production   | agric. sc.      |
| Appleby, M.C. Sustainable Agriculture is Humane, Humane Agriculture is Sustainable. <i>J. Agric. Environ. Ethics</i> <b>2005</b> , 18, 293–303.                                                                       | food system  | human.          |
| Astier-Calderín, M.; Maass-Moreno, M.; Etchevers-Barra, J. Derivación de indicadores de calidad de suelos en el contexto de la agricultura sustentable. <i>Agrociencia</i> <b>2002</b> , 36, 605–620.                 | production   | eng.& nat. sc.  |
| Barbier, E.B.; Markandya, A.; Pearce, D.W. Sustainable agricultural development and project appraisal. <i>Eur. Rev. Agric. Econ.</i> <b>1990</b> , 17, 181–196.                                                       | production   | econ.           |
| Bebbington, A.J. Farmer knowledge, institutional resources and sustainable agricultural strategies: a case study from the eastern slopes of the Peruvian Andes. <i>Bull. Latin Am. Res.</i> <b>1990</b> , 9, 203–228. | production   | human.          |

Table S1. Cont.

| Reference                                                                                                                                                                                                                                                     | Focus        | Discipline      |
|---------------------------------------------------------------------------------------------------------------------------------------------------------------------------------------------------------------------------------------------------------------|--------------|-----------------|
| <i>Journal Articles</i>                                                                                                                                                                                                                                       |              |                 |
| Bédanger, V.; Vanasse, A.; Parent, D.; Allard, G.; Pellerin, D. Development of agri-environmental indicators to assess dairy farm sustainability in Quebec, Eastern Canada. <i>Ecol. Indic.</i> <b>2012</b> , <i>23</i> , 421–430.                            | production   | agric. sc.      |
| Beus, C.E.; Dunlap, R.E. Conventional Versus Alternative Agriculture: the Paradigmatic Roots of the Debate. <i>Rural Sociologyl</i> <b>1990</b> , <i>55</i> , 590–616.                                                                                        | food system  | soc. & pol. sc. |
| Binder, C.R.; Feola, G.; Steinberger, J.K. Considering the normative, systemic and procedural dimensions in indicator-based sustainability assessments in agriculture. <i>Environ. Impact Assess. Rev.</i> <b>2010</b> , <i>30</i> , 71–81.                   | production   | interdisc.      |
| Blunden, G.; Cocklin, C.; Smith, W.; Moran, W. Sustainability: A view from the paddock. <i>N. Zeal. Geogr.</i> <b>1996</b> , <i>52</i> , 24–34.                                                                                                               | production   | interdisc.      |
| Borch, K. Emerging technologies in favour of sustainable agriculture. <i>Futures</i> <b>2007</b> , <i>39</i> , 1045–1066.                                                                                                                                     | production   | interdisc.      |
| Bowler, I. Developing sustainable agriculture. <i>Geography</i> <b>2002</b> , <i>87</i> , 205–212.                                                                                                                                                            | food system  | interdisc.      |
| Buckland, J. International obstacles to rural development: How neoliberal policies constrain competitive markets and sustainable agriculture. <i>Can. J. Dev. Stud.</i> <b>2006</b> , <i>27</i> , 9–24.                                                       | production   | econ.           |
| Burkhardt, J. The morality behind sustainability. <i>J. Agric. Ethics</i> <b>1989</b> , <i>2</i> , 113–128.                                                                                                                                                   | production   | human.          |
| Buttel, F.H. The politics and policies of sustainable agriculture: Some concluding remarks. <i>Soc. Nat. Resour.</i> <b>1997</b> , <i>10</i> , 341–344.                                                                                                       | food system  | soc. & pol. sc. |
| Caviglia, J.L.; Kahn, J.R. Diffusion of Sustainable Agriculture in the Brazilian Tropical Rain Forest: A Discrete Choice Analysis. <i>Econ. Dev. Cult. Chang.</i> <b>2001</b> , <i>49</i> , 311–333.                                                          | production   | econ.           |
| Chiappe, M.B.; Butler Flora, C. Gendered Elements of the Alternative Agriculture Paradigm. <i>Rural Sociol.</i> <b>1998</b> , <i>63</i> , 372–393.                                                                                                            | food system  | soc. & pol. sc. |
| Chokor, B.A.; Odemerho, F.O. Land degradation assessment by small scale traditional African farmers and implications for sustainable conservation management. <i>Geoforum</i> <b>1994</b> , <i>25</i> , 145–154.                                              | production   | interdisc.      |
| Christianson, L.; Tyndall, J. Seeking a dialogue: a targeted technology for sustainable agricultural systems in the American Corn Belt. <i>Sustain. Sci. Pract. Policy</i> <b>2011</b> , <i>7</i> , 70–77.                                                    | production   | eng. & nat. sc. |
| Cobb, D.; Dolman, P.; O’Riordan, T. Interpretations of sustainable agriculture in the UK. <i>Progress in Human Geography</i> <b>1999</b> , <i>23</i> , 209–235.                                                                                               | food system  | interdisc.      |
| Culleton, N.; Tunney, H.; Coulter, B. Sustainability in Irish agriculture. <i>Irish Geography</i> <b>1994</b> , <i>27</i> , 36–47.                                                                                                                            | production   | agric. sc.      |
| Dantsis, T.; Loumou, A.; Giourga, C. Organic Agriculture’s Approach towards Sustainability; Its Relationship with the Agro-Industrial Complex, A Case Study in Central Macedonia, Greece. <i>J. Agric. Environ. Ethics</i> <b>2009</b> , <i>22</i> , 197–216. | supply chain | interdisc.      |
| Dillon, E.J.; Hennessy, T.; Hynes, S. Assessing the sustainability of Irish agriculture. <i>Int. J. Agric. Sustain.</i> <b>2010</b> , <i>8</i> , 131–147.                                                                                                     | production   | econ.           |
| Dima, S.J.; Odero, A.N. Organic Farming for Sustainable Agricultural Production: A Brief Theoretical Review and Preliminary Empirical Evidence. <i>Environ. Resour. Econ.</i> <b>1997</b> , <i>10</i> , 177–188.                                              | production   | econ.           |
| Dubey, N.K.; Shukla, R.; Kumar, A.; Singh, P.; Prakas, B. Prospects of botanical pesticides in sustainable agriculture. <i>Curr. Sci.</i> <b>2010</b> , <i>98</i> , 479–480.                                                                                  | production   | eng. & nat. sc. |

Table S1. Cont.

| Reference                                                                                                                                                                                                                                                                      | Focus        | Discipline      |
|--------------------------------------------------------------------------------------------------------------------------------------------------------------------------------------------------------------------------------------------------------------------------------|--------------|-----------------|
| <i>Journal Articles</i>                                                                                                                                                                                                                                                        |              |                 |
| Duvick, D.N. Biotechnology is compatible with sustainable agriculture. <i>J. Agric. Environ. Ethics</i> <b>1995</b> , 8, 112–125.                                                                                                                                              | production   | agric. sc.      |
| Epps, R. The sustainability of Australian agricultural production systems: a realistic objective or simply a desirable aim? <i>Aust. Geogr.</i> <b>1995</b> , 26, 173–179.                                                                                                     | production   | interdisc.      |
| Erenstein, O.; Sayre, K.; Wall, P.; Hellin, J.; Dixon, J. Conservation Agriculture in Maize- and Wheat-Based Systems in the (Sub)tropics: Lessons from Adaptation Initiatives in South Asia, Mexico, and Southern Africa. <i>J. Sustain. Agric.</i> <b>2012</b> , 36, 180–206. | production   | agric. sc.      |
| Falvey, L. Agri-history and sustainable agriculture: A consideration of technology and ancient wisdom. <i>Asian Agri-Hist.</i> <b>2003</b> , 7, 279–294.                                                                                                                       | production   | agric. sc.      |
| Feldman, S.; Welsh, Rick. Feminist Knowledge Claims, Local Knowledge, and Gender Divisions of Agricultural Labor: Constructing a Successor Science1. <i>Rural Sociol.</i> <b>1995</b> , 60, 23–43.                                                                             | production   | soc. & pol. sc. |
| Ferreira, C. Emergy analysis of one century of agricultural production in the Rolling Pampas of Argentina. <i>Int. J. Agric. Resour. Gov. Ecol.</i> <b>2006</b> , 5, 185–205.                                                                                                  | production   | interdisc.      |
| Filson, G.C. Demographic and farm characteristic differences in ontario farmers' views about sustainability policies. <i>J. Agric. Environ. Ethics</i> <b>1996</b> , 9, 165–180.                                                                                               | production   | soc. & pol. sc. |
| Firbank, L.G. Commentary: Pathways to global sustainable agriculture. <i>Int. J. Agric. Sustain.</i> <b>2012</b> , 10, 1–4.                                                                                                                                                    | production   | eng. & nat. sc. |
| Fışun Tatlıdil, F.; Boz, İ.; Tatlıdil, H. Farmers' perception of sustainable agriculture and its determinants: a case study in Kahramanmaraş province of Turkey. <i>Environ. Dev. Sustain.</i> <b>2009</b> , 11, 1091–1106.                                                    | supply chain | agric. sc.      |
| Girardin, P.; Bockstaller, C.; van der Werf, H. Assessment of potential impacts of agricultural practices on the environment. <i>Environmental Impact Assessment Review</i> <b>2000</b> , 20, 227–239.                                                                         | production   | agric. sc.      |
| Goldberger, J.R. Conventionalization, civic engagement, and the sustainability of organic agriculture. <i>J. Rural Stud.</i> <b>2011</b> , 27, 288–296.                                                                                                                        | food system  | agric. sc.      |
| Goldman, A. Threats to sustainability in African agriculture: Searching for appropriate paradigms. <i>Hum. Ecol.</i> <b>1995</b> , 23, 291–334.                                                                                                                                | production   | interdisc.      |
| Gómez-Limón, J.A.; Sanchez-Fernandez, G. Empirical evaluation of agricultural sustainability using composite indicators. <i>Ecol. Econ.</i> <b>2010</b> , 69, 1062–1075.                                                                                                       | production   | econ.           |
| Goodland, R. Environmental sustainability in agriculture: diet matters. <i>Ecol. Econ.</i> <b>1997</b> , 23, 189–200.                                                                                                                                                          | food system  | interdisc.      |
| Goodwin, N.R. Lessons for the world from US agriculture: Unbundling technology. <i>World Dev.</i> <b>1991</b> , 19, 85–102.                                                                                                                                                    | production   | interdisc.      |
| Hermans, F.; Horlings, I.; Beers, P.J.; Mommaas, H. The Contested Redefinition of a Sustainable Countryside: Revisiting Frouws' Rurality Discourses. <i>Sociol. Ruralis</i> <b>2010</b> , 50, 46–63.                                                                           | food system  | soc. & pol. sc. |
| Hermans, F.; Kok, K.; Beers, P.J.; Veldkamp, T. Assessing Sustainability Perspectives in Rural Innovation Projects Using Q-Methodology. <i>Sociol. Ruralis</i> <b>2012</b> , 52, 70–91.                                                                                        | food system  | soc. & pol. sc. |
| Herndl, C.G.; Goodwin, J.; Honeycutt, L.; Wilson, G.; Graham, S.S.; Niederges, D. Talking Sustainability: Identification and Division in an Iowa Community. <i>J. Sustain. Agric.</i> <b>2011</b> , 35, 436–461.                                                               | production   | human.          |

Table S1. Cont.

| Reference                                                                                                                                                                                                                                                                                                                                          | Focus        | Discipline      |
|----------------------------------------------------------------------------------------------------------------------------------------------------------------------------------------------------------------------------------------------------------------------------------------------------------------------------------------------------|--------------|-----------------|
| <i>Journal Articles</i>                                                                                                                                                                                                                                                                                                                            |              |                 |
| Hill, S.B. Redesigning agroecosystems for environmental sustainability: a deep systems approach. <i>Syst. Res. Behav. Sci.</i> <b>1998</b> , <i>15</i> , 391–402.                                                                                                                                                                                  | production   | soc. & pol. sc. |
| Hiranandani, V. Sustainable agriculture in Canada and Cuba: a comparison. <i>Environ. Dev. Sustain.</i> <b>2010</b> , <i>12</i> , 763–775.                                                                                                                                                                                                         | supply chain | soc. & pol. sc. |
| Horlings, I. Policy conditions for sustainable agriculture in the Netherlands. <i>Environmentalist</i> <b>1994</b> , <i>14</i> , 193–199.                                                                                                                                                                                                          | supply chain | soc. & pol. sc. |
| Huang, S.-M. The articulation of culture, agriculture, and the environment of Chinese in northern Thailand. <i>Ethnology</i> <b>2005</b> , <i>44</i> , 1–11.                                                                                                                                                                                       | production   | human.          |
| Hyberg, B.; Setia, P. Economic and environmental tradeoffs in agricultural sustainability: A Perspective. <i>Int. Adv. Econ. Res.</i> <b>1996</b> , <i>2</i> , 41–46.                                                                                                                                                                              | production   | econ.           |
| Ikerd, J. Sustainable Capitalism: A Matter of Ethics and Morality. <i>Probl. Ekorozw.</i> <b>2008</b> , <i>3</i> , 13–22.                                                                                                                                                                                                                          | food system  | econ.           |
| Izac, A.-M.N.; Swift, M.J. On agricultural sustainability and its measurement in small-scale farming in sub-Saharan Africa. <i>Ecol. Econ.</i> <b>1994</b> , <i>11</i> , 105–125.                                                                                                                                                                  | production   | agric. sc.      |
| Johnson, R.B. Sustainable agriculture: Competing visions and policy avenue. <i>Int. J. Sustain. Dev. World Ecol.</i> <b>2006</b> , <i>13</i> , 469–480.                                                                                                                                                                                            | food system  | interdisc.      |
| Kaltoft, P. Values about Nature in Organic Farming Practice and Knowledge. <i>Sociol. Ruralis</i> <b>1999</b> , <i>39</i> , 39–53.                                                                                                                                                                                                                 | production   | econ.           |
| Karami, E.; Mansoorabadi, A. Sustainable agricultural attitudes and behaviors: a gender analysis of Iranian farmers. <i>Environ. Dev. Sustain.</i> <b>2008</b> , <i>10</i> , 883–898.                                                                                                                                                              | production   | soc. & pol. sc. |
| Kasem, S.; Thapa, G.B. Sustainable development policies and achievements in the context of the agriculture sector in Thailand. <i>Sustain. Dev.</i> <b>2012</b> , <i>20</i> , 98–114.                                                                                                                                                              | food system  | eng. & nat. sc. |
| Kloppenburger Jr., J.; Lezberg, S.; De Master, K.; Stevenson, G.W.; Hendrickson, J. Tasting food, tasting sustainability: Defining the attributes of an alternative food system with competent, ordinary people. <i>Hum. Org.</i> <b>2000</b> , <i>59</i> , 177–186.                                                                               | food system  | soc. & pol. sc. |
| Knight, C. Sustainable cocoa program. <i>Plant. Rech. Dev.</i> <b>1998</b> , <i>5</i> , 387–392.                                                                                                                                                                                                                                                   | supply chain | agric. sc.      |
| Koohafkan, P.; Altieri, M.A.; Gimenez, E.H. Green Agriculture: foundations for biodiverse, resilient and productive agricultural systems. <i>Int. J. Agric. Sustain.</i> <b>2012</b> , <i>10</i> , 61–75.                                                                                                                                          | food system  | agric. sc.      |
| Lancker, E.; Nijkamp, P. A policy scenario analysis of sustainable agricultural development options: A case study for Nepal. <i>Impact Assess. Proj. Apprais.</i> <b>2000</b> , <i>18</i> , 111–124.                                                                                                                                               | production   | econ.           |
| Lee, D.R. Agricultural Sustainability and Technology Adoption: Issues and Policies for Developing Countries. <i>Am. J. Agric. Econ.</i> <b>2005</b> , <i>87</i> , 1325–1334.                                                                                                                                                                       | production   | econ.           |
| Legg, W.; Viatte, G. Farming systems for sustainable agriculture. Available online: <a href="http://www.oecdobserver.org/news/archivestory.php/aid/508/Farming_systems_for_sustainable_agriculture.html">http://www.oecdobserver.org/news/archivestory.php/aid/508/Farming_systems_for_sustainable_agriculture.html</a> (accessed on 15 June 2015) | supply chain | soc. & pol. sc. |
| Lehman, H.; Clark, E.A.; Weise, S.F. Clarifying the definition of Sustainable agriculture. <i>J. Agric. Environ. Ethics</i> <b>1993</b> , <i>6</i> , 127–143.                                                                                                                                                                                      | production   | human.          |
| Levidow, L.; Birch, K.; Papaioannou, T. EU agri-innovation policy: two contending visions of the bio-economy. <i>Crit. Policy Stud.</i> <b>2012</b> , <i>6</i> , 40–65.                                                                                                                                                                            | food system  | soc. & pol. sc. |
| Liepins, R. Women in agriculture: advocates for a gendered sustainable agriculture. <i>Aust. Geogr.</i> <b>1995</b> , <i>26</i> , 118–126.                                                                                                                                                                                                         | production   | interdisc.      |

Table S1. Cont.

| Reference                                                                                                                                                                                                                                                                                                                         | Focus        | Discipline      |
|-----------------------------------------------------------------------------------------------------------------------------------------------------------------------------------------------------------------------------------------------------------------------------------------------------------------------------------|--------------|-----------------|
| <i>Journal Articles</i>                                                                                                                                                                                                                                                                                                           |              |                 |
| Lin, Z.; Zebisch, M.A. Resource use and agricultural sustainability: Risks and consequences of intensive cropping in China. <i>J. Agric. Rural Dev. Trop. Subtrop. Suppl.</i> <b>2006</b> , <i>86</i> , 1–204.                                                                                                                    | production   | agric. sc.      |
| López-Aguilar, R.; Rodríguez-Quezada, G.; Naranjo-Murillo, A.; Beltrán Morales, L.F.; Troyo-Diéguez, E.E.; Casanova-Cruz, A.; Peralta-Patrón, O.; Troyo-Diéguez, E.E. Uso de yeso para una agricultura orgánica sustentable en zonas áridas y semiáridas. <i>Indian J. Dryland Agric. Res.</i> <b>2012</b> , <i>37</i> , 594–601. | production   | eng. & nat. sc. |
| MacRae, R.J.; Henning, J.; Hill, S.B. Strategies to overcome barriers to the development of sustainable agriculture in Canada: The role of agribusiness. <i>J. Agric. Environ. Ethics</i> <b>1993</b> , <i>6</i> , 21–51.                                                                                                         | production   | econ.           |
| Manuel-Navarrete, D.; Gallopín, G.C. Feeding the world sustainably: knowledge governance and sustainable agriculture in the Argentine Pampas. <i>Environ. Dev. Sustain.</i> <b>2012</b> , <i>14</i> , 321–333.                                                                                                                    | production   | interdisc.      |
| Matson, P.A.; Parton, W.J.; Power, A.G.; Swift, M.J. Agricultural Intensification and Ecosystem Properties. <i>Science</i> <b>1997</b> , <i>277</i> , 504–509.                                                                                                                                                                    | production   | eng. & nat. sc. |
| Maxey, L. Can we sustain sustainable agriculture? Learning from small-scale producer-suppliers in Canada and the UK. <i>Geogr. J.</i> <b>2006</b> , <i>172</i> , 230–244.                                                                                                                                                         | food system  | interdisc.      |
| Meares, A.C. Making the Transition from Conventional to Sustainable Agriculture: Gender, Social Movement Participation, and Quality of Life on the Family Farm1. <i>Rural Sociol.</i> <b>1997</b> , <i>62</i> , 21–47.                                                                                                            | production   | soc. & pol. sc. |
| Michelsen, J. Organic Farming in a Regulatory Perspective. The Danish Case. <i>Sociol. Ruralis</i> <b>2001</b> , <i>41</i> , 62–84.                                                                                                                                                                                               | food system  | soc. & pol. sc. |
| Minarovic, R.E.; Mueller, J.P. North Carolina Cooperative Extension Service Professionals' Attitudes Toward Sustainable Agriculture. <i>J. Ext.</i> <b>2000</b> , <i>38</i> , Article 1.                                                                                                                                          | production   | soc. & pol. sc. |
| Morse, S.; McNamara, N.; Acholo, M. Soils, souls and agricultural sustainability: The need for connection. <i>Int. J. Sustain. Dev.</i> <b>2004</b> , <i>7</i> , 410–432.                                                                                                                                                         | production   | interdisc.      |
| Mouysset, L.; Doyen, L.; Jiguet, F.; Allaire, G.; Leger, F. Bio economic modeling for a sustainable management of biodiversity in agricultural lands. <i>Ecol. Econ.</i> <b>2011</b> , <i>70</i> , 617–626.                                                                                                                       | production   | eng. & nat. sc. |
| Nousiainen, M.; Pylkkänen, P.; Saunders, F.; Seppänen, L.; Vesala, K.M. Are Alternative Food Systems Socially Sustainable? A Case Study from Finland. <i>J. Sustain. Agric.</i> <b>2009</b> , <i>33</i> , 566–594.                                                                                                                | food system  | soc. & pol. sc. |
| Ogaji, J. Sustainable Agriculture in the UK. <i>Environ. Dev. Sustain.</i> <b>2005</b> , <i>7</i> , 253–270.                                                                                                                                                                                                                      | food system  | human.          |
| Onwueme, I.C.; Borsari, B.; Leal Filho, W.D.S. An analysis of some paradoxes in alternative agriculture and a vision of sustainability for future food systems. <i>Int. J. Agric. Resour. Gov. Ecol.</i> <b>2008</b> , <i>7</i> , 199–210.                                                                                        | food system  | eng. & nat. sc. |
| O'Riordan, T.; Cobb, D. Assessing the Consequences of Converting to Organic Agriculture. <i>J. Agric. Econ.</i> <b>2001</b> , <i>52</i> , 22–35.                                                                                                                                                                                  | supply chain | interdisc.      |
| Paoletti, M.G.; Pimentel, D. The environmental and economic costs of herbicide resistance and host-plant resistance to plant pathogens and insects. <i>Technol. Forecast. Soc. Chang.</i> <b>1995</b> , <i>50</i> , 9–23.                                                                                                         | production   | eng. & nat. sc. |

Table S1. Cont.

| Reference                                                                                                                                                                                                      | Focus        | Discipline      |
|----------------------------------------------------------------------------------------------------------------------------------------------------------------------------------------------------------------|--------------|-----------------|
| <i>Journal Articles</i>                                                                                                                                                                                        |              |                 |
| Peter, G.; Bell, M.M.; Jarnagin, S.; Bauer, D. Coming Back Across the Fence: Masculinity and the Transition to Sustainable Agriculture*. <i>Rural Sociol.</i> <b>2000</b> , <i>65</i> , 215–233.               | supply chain | soc. & pol. sc. |
| Peters, K.A. Creating a sustainable urban agriculture revolution. <i>J. Environ. Law Litig.</i> <b>2010</b> , <i>25</i> , 203–247.                                                                             | supply chain | human.          |
| Phillips, C.J.C.; Sorensen, J.T. Sustainability in cattle production systems. <i>J. Agric. Environ. Ethics</i> <b>1993</b> , <i>6</i> , 61–73.                                                                 | production   | agric. sc.      |
| Pierce, J.T. Agriculture, sustainability and the imperatives of policy reform. <i>Geoforum</i> <b>1993</b> , <i>24</i> , 381–396.                                                                              | production   | interdisc.      |
| Power, A.G. Linking Ecological Sustainability and World Food Needs. <i>Environ. Dev. Sustain.</i> <b>1999</b> , <i>1</i> , 185–196.                                                                            | production   | eng. & nat. sc. |
| Prasad, R. Sustainable agriculture and fertilizer use. <i>Curr. Sci.</i> <b>1999</b> , <i>77</i> , 38–43.                                                                                                      | production   | agric. sc.      |
| Pretty, J.N. Alternative systems of inquiry for a sustainable agriculture. <i>IDS Bull.</i> <b>1994</b> , <i>25</i> , 37–48.                                                                                   | production   | interdisc.      |
| Pretty, J.N. Participatory learning for sustainable agriculture. <i>World Dev.</i> <b>1995</b> , <i>23</i> , 1247–1263.                                                                                        | production   | interdisc.      |
| Pretty, J.N. Sustainable agriculture, people and the resource base: impacts on food production. <i>Forum Dev. Stud.</i> <b>1997</b> , <i>1</i> , 7–32.                                                         | production   | interdisc.      |
| Pretty, J.N. Can Sustainable Agriculture Feed Africa? New Evidence on Progress, Processes and Impacts. <i>Environ. Dev. Sustain.</i> <b>1999</b> , <i>1</i> , 253–274.                                         | supply chain | interdisc.      |
| Pretty, J.N. Towards sustainable food and farming systems in industrialized countries. <i>Int. J. Agric. Resour. Gov. Ecol.</i> <b>2000</b> , <i>1</i> , 77–94.                                                | supply chain | interdisc.      |
| Psarikidou, K.; Szerszynski, B. Growing the social: alternative agrofood networks and social sustainability in the urban ethical foodscape. <i>Sustain. Sci. Pract. Policy</i> <b>2012</b> , <i>8</i> , 30–39. | production   | soc. & pol. sc. |
| Ramakrishnan, P. Sustainable Agriculture and Food Security: India-China Context. <i>China Rep.</i> <b>2007</b> , <i>43</i> , 219–229.                                                                          | production   | interdisc.      |
| Ramanjaneyulu, G.V. Adapting Smallholder Agriculture to Climate Change. <i>IDS Bull.</i> <b>2012</b> , <i>43</i> , 113–121.                                                                                    | production   | agric. sc.      |
| Rasul, G.; Thapa, G.B. Sustainability Analysis of Ecological and Conventional Agricultural Systems in Bangladesh. <i>World Dev.</i> <b>2003</b> , <i>31</i> , 1721–1741.                                       | production   | eng. & nat. sc. |
| Reganold, J.P.; Papendick, R.I.; Parr, J.F. Sustainable Agriculture. <i>Sci. Am.</i> <b>1990</b> , <i>262</i> , 112–120.                                                                                       | production   | agric. sc.      |
| Reganold, J.P.; Glover, J.D.; Andrews, P.K.; Hinman, H.R. Sustainability of three apple production systems. <i>Nature</i> <b>2001</b> , <i>410</i> , 926–930.                                                  | production   | agric. sc.      |
| Rezaei-Moghaddam, K.; Karami, E. A multiple criteria evaluation of sustainable agricultural development models using AHP. <i>Environ. Dev. Sustain.</i> <b>2008</b> , <i>10</i> , 407–426.                     | supply chain | soc. & pol. sc. |
| Rigby, D.; Woodhouse, P.; Young, T.; Burton, M. Constructing a farm level indicator of sustainable agricultural practice. <i>Ecol. Econ.</i> <b>2001</b> , <i>39</i> , 463–478.                                | production   | econ.           |
| Robinson, G.M. Towards Sustainable Agriculture: Current Debates. <i>Geogr. Compass</i> <b>2009</b> , <i>3</i> , 1757–1773.                                                                                     | food system  | soc. & pol. sc. |
| Rosset, P.M.; Altieri, M.A. Agroecology vs. input substitution: A fundamental contradiction of sustainable agriculture. <i>Soc. Natl. Resour.</i> <b>1997</b> , <i>10</i> , 283–295.                           | supply chain | soc. & pol. sc. |

Table S1. Cont.

| Reference                                                                                                                                                                                                                                          | Focus        | Discipline      |
|----------------------------------------------------------------------------------------------------------------------------------------------------------------------------------------------------------------------------------------------------|--------------|-----------------|
| <i>Journal Articles</i>                                                                                                                                                                                                                            |              |                 |
| Saifi, B.; Drake, L. A coevolutionary model for promoting agricultural sustainability. <i>Ecol. Econ.</i> <b>2008</b> , <i>65</i> , 24–34.                                                                                                         | supply chain | soc. & pol. sc. |
| Saltiel, J.; Bauder, J.W.; Palakovich, S. Adoption of Sustainable Agricultural Practices: Diffusion, Farm Structure, and Profitability <sup>1</sup> . <i>Rural Sociol.</i> <b>1994</b> , <i>59</i> , 333–349.                                      | production   |                 |
| Sharma, T.; Carmichael, J.; Klinkenberg, B. Integrated modeling for exploring sustainable agriculture futures. <i>Futures</i> <b>2006</b> , <i>38</i> , 93–113.                                                                                    | production   | interdisc.      |
| Shepherd, J. Creating whose future: Sustainable agricultural policy for Australia? <i>Int. J. Environ. Cult. Econ. Soc. Sustain.</i> <b>2011</b> , <i>7</i> , 377–395.                                                                             | supply chain | interdisc.      |
| Shi, T. Applying a holistic approach to agricultural sustainability research: A methodological synthesis of ecological economics and system dynamics. <i>J. Interdiscip. Econ.</i> <b>2004</b> , <i>16</i> , 77–93.                                | production   | econ.           |
| Shi, T.; Gill, R. Developing effective policies for the sustainable development of ecological agriculture in China: the case study of Jinshan County with a systems dynamics model. <i>Ecol. Econ.</i> <b>2005</b> , <i>53</i> , 223–246.          | production   | econ.           |
| Smith, N.J.H. Strategies for Sustainable Agriculture in the Tropics. <i>Ecol. Econ.</i> <b>1990</b> , <i>2</i> , 311–323.                                                                                                                          | production   | interdisc.      |
| Tait, J.; Morris, D. Sustainable development of agricultural systems: competing objectives and critical limits. <i>Futures</i> <b>2000</b> , <i>32</i> , 247–260.                                                                                  | production   | soc. & pol. sc. |
| Tey, Y.S.; Brindal, M. Factors influencing the adoption of precision agricultural technologies: a review for policy implications. <i>Precis. Agric.</i> <b>2012</b> , <i>13</i> , 713–730.                                                         | production   | agric. sc.      |
| Thomas, V.G.; Kevan, P.G. Basic principles of agroecology and sustainable agriculture. <i>J. Agric. Environ. Ethics</i> <b>1993</b> , <i>6</i> , 1–19.                                                                                             | food system  | eng. & nat. sc. |
| Thompson, J.; Scoones, I. Addressing the dynamics of agri-food systems: an emerging agenda for social science research. <i>Environ. Sci. Policy</i> <b>2009</b> , <i>12</i> , 386–397.                                                             | production   | interdisc.      |
| Thrupp, L.A. Linking Agricultural Biodiversity and Food Security: The Valuable Role of Sustainable Agriculture. <i>Int. Aff.</i> <b>2000</b> , <i>76</i> , 265–281.                                                                                | production   | soc. & pol. sc. |
| Tilak, K.V.B.R.; Ranganayaki, N.; Pal, K.K.; De, R.; Saxena, A.K.; Shekhar Nautiyal, C.; Mittal, S.; Tripathi, A.K.; Johri, B. Diversity of plant growth and soil health supporting bacteria. <i>Curr. Sci.</i> <b>2005</b> , <i>89</i> , 136–151. | production   | eng. & nat. sc. |
| Tilman, D.; Cassman, K.G.; Matson, P.A.; Naylor, R.; Polasky, S. Agricultural sustainability and intensive production practices. <i>Nature</i> <b>2002</b> , <i>418</i> , 671–677.                                                                 | production   | eng. & nat. sc. |
| Vallianatos, E. The democratic and sacred nature of agriculture. <i>Environ. Dev. Sustain.</i> <b>2012</b> , <i>14</i> , 335–346.                                                                                                                  | production   | eng. & nat. sc. |
| Veerman, C. Agriculture Under the Public Eye: Who Cares for What? <i>Eurochoices</i> <b>2004</b> , <i>3</i> , 6–11.                                                                                                                                | production   | econ.           |
| Walter, C.; Stützel, H. A new method for assessing the sustainability of land-use systems (I): Identifying the relevant issues. <i>Ecol. Econ.</i> <b>2009</b> , <i>68</i> , 1275–1287.                                                            | production   | agric. sc.      |
| Wang, X.; Liu, W.; Wu, W. A holistic approach to the development of sustainable agriculture: application of the ecosystem health model. <i>Int. J. Sustain. Dev. World Ecol.</i> <b>2009</b> , <i>16</i> , 339–345.                                | production   | agric. sc.      |
| Warmington, T. Local, low-impact fibres: Approaches to sustainability in Australian wool production. <i>Int. J. Environ. Cult. Econ. Soc. Sustain.</i> <b>2011</b> , <i>7</i> , 365–377.                                                           | production   | human.          |

Table S1. Cont.

| Reference                                                                                                                                                                                                                                                                                                                                                                                                                                                                                                                                                         | Focus        | Discipline      |
|-------------------------------------------------------------------------------------------------------------------------------------------------------------------------------------------------------------------------------------------------------------------------------------------------------------------------------------------------------------------------------------------------------------------------------------------------------------------------------------------------------------------------------------------------------------------|--------------|-----------------|
| <i>Journal Articles</i>                                                                                                                                                                                                                                                                                                                                                                                                                                                                                                                                           |              |                 |
| Webster, P. The Challenge of Sustainability at the Farm Level: Presidential Address. <i>J. Agric. Econ.</i> <b>1999</b> , 50, 371–387.                                                                                                                                                                                                                                                                                                                                                                                                                            | production   | econ.           |
| Winder, G. Nachhaltigkeit und strukturelle Veränderungen in der Landwirtschaft Neuseelands. <i>Geogr. Rundsch.</i> <b>2012</b> , 36–41.                                                                                                                                                                                                                                                                                                                                                                                                                           | supply chain | interdisc.      |
| Xie, J.; Hu, L.; Tang, J.; Wu, X.; Li, N.; Yuan, Y.; Yang, H.; Zhang, J.; Luo, S.; Chen, X. Ecological mechanisms underlying the sustainability of the agricultural heritage rice-fish coculture system. <i>Proc. Natl. Acad. Sci. USA</i> <b>2011</b> , 108, E1381.                                                                                                                                                                                                                                                                                              | production   | eng.& nat. sci. |
| Yunlong, C.; Smit, B. Sustainability in agriculture: a general review. <i>Agric. Ecosyst. Environ.</i> <b>1994</b> , 49, 299–307.                                                                                                                                                                                                                                                                                                                                                                                                                                 | production   | interdisc.      |
| Zahm, F.; Viaux, P.; Vilain, L.; Girardin, P.; Mouchet, C. Assessing farm sustainability with the IDEA method-from the concept of agriculture sustainability to case studies on farms. <i>Sust. Dev.</i> <b>2008</b> , 16, 271–281.                                                                                                                                                                                                                                                                                                                               | production   | agric. sci.     |
| Zapf, R.; Schultheiss, U.; Doluschitz, R.; Oppermann, R.; Dähler, H. Nachhaltigkeitsbewertungssysteme-Allgemeine Anforderungen und vergleichende Beurteilung der Systeme RISE, KSNL und DLG-Zertifizierungssystem für nachhaltige Landwirtschaft. <i>Berichte über Landwirtschaft</i> <b>2009</b> , 87, 402–427.                                                                                                                                                                                                                                                  | production   | eng.& nat. sci. |
| Zhang, Q. Strategies for developing Green Super Rice. <i>Proc. Natl. Acad. Sci. USA</i> <b>2007</b> , 104, 16402–16409.                                                                                                                                                                                                                                                                                                                                                                                                                                           | production   | eng.& nat. sci. |
| <i>Grey Literature</i>                                                                                                                                                                                                                                                                                                                                                                                                                                                                                                                                            |              |                 |
| Agenda 21: Konferenz der Vereinten Nationen für Umwelt und Entwicklung: Rio de Janeiro, June 1992. Available online: <a href="http://www.un.org/Depts/german/conf/agenda21/agenda_21.pdf">http://www.un.org/Depts/german/conf/agenda21/agenda_21.pdf</a> (accessed on 15 June 2015).                                                                                                                                                                                                                                                                              |              |                 |
| Agriculture and Natural Resources Team. <i>Agricultural Sustainability</i> ; UK Department for International Development (DFID): London, UK, 2004. Available online: <a href="http://dfid-agriculture-consultation.nri.org/summaries/wp12.pdf">http://dfid-agriculture-consultation.nri.org/summaries/wp12.pdf</a> (accessed on 29 June 2012).                                                                                                                                                                                                                    |              |                 |
| Australian Academy of Science. Feeding the Future—Sustainable Agriculture, 2011. Available online: <a href="http://www.science.org.au/nova/071/071key.htm">http://www.science.org.au/nova/071/071key.htm</a> (accessed on 2 July 2012).                                                                                                                                                                                                                                                                                                                           |              |                 |
| Beirat der Fördergemeinschaft Nachhaltige Landwirtschaft e.V. <i>Nachhaltige Landwirtschaft: Ein Positionspapier des; Beirats der Fördergemeinschaft Nachhaltige Landwirtschaft</i> : Berlin, Germany, 2011.                                                                                                                                                                                                                                                                                                                                                      |              |                 |
| Deutsche Landwirtschafts-Gesellschaft e.V. <i>DLG-Nachhaltigkeitsstandard: Effizienz Steigern, Image Pflegen, Ressourcen Schonen</i> ; Neues Konzept: Frankfurt am Main, Germany, 2011.                                                                                                                                                                                                                                                                                                                                                                           |              |                 |
| Earles, R.; Williams, P. Sustainable Agriculture: An Introduction, 2005. Available online: <a href="http://www.hfcsd.org/webpages/rivingston/files/sustagintro.pdf">http://www.hfcsd.org/webpages/rivingston/files/sustagintro.pdf</a> (accessed on 4 December 2011).                                                                                                                                                                                                                                                                                             |              |                 |
| FAO. <i>Towards the Future We Want</i> ; FAO: Rome, Italy, 2012.                                                                                                                                                                                                                                                                                                                                                                                                                                                                                                  |              |                 |
| Feenstra, G.; Ingels, C.; Campbell, D. What is Sustainable Agriculture? Available online: <a href="http://www.sarep.ucdavis.edu/sarep/about/def">http://www.sarep.ucdavis.edu/sarep/about/def</a> (accessed on 2 August 2012).                                                                                                                                                                                                                                                                                                                                    |              |                 |
| Giovanucci, D.; Scherr, S.; Nierenberg, D.; Hebebrand, C.; Shapiro, J.; Milder, J.; Wheeler, K. <i>Food and Agriculture: The Future of Sustainability: A Strategic Input to the Sustainable Development in the 21st Century (SD21) Project</i> ; United Nations: New York, NY, USA, 2012. Available online: <a href="http://www.un.org/esa/dsd/dsd_sd21st/21_pdf/agriculture_and_food_the_future_of_sustainability_web.pdf">http://www.un.org/esa/dsd/dsd_sd21st/21_pdf/agriculture_and_food_the_future_of_sustainability_web.pdf</a> (accessed on 25 July 2012). |              |                 |



Table S1. Cont.

| Reference                                                                                                                                                                                                                                                                                                                                                                                                                                                                             | Focus | Discipline |
|---------------------------------------------------------------------------------------------------------------------------------------------------------------------------------------------------------------------------------------------------------------------------------------------------------------------------------------------------------------------------------------------------------------------------------------------------------------------------------------|-------|------------|
| <i>Grey Literature</i>                                                                                                                                                                                                                                                                                                                                                                                                                                                                |       |            |
| Gold, M.V. Sustainable Agriculture: Definitions and Terms, 2007. Available online: <a href="http://www.nal.usda.gov/afsic/pubs/terms/srb9902.shtml">http://www.nal.usda.gov/afsic/pubs/terms/srb9902.shtml</a> (accessed on 18 June 2012).                                                                                                                                                                                                                                            |       |            |
| GRACE Communications Foundation. What is Sustainable Agriculture? Introduction to Sustainability. Available online: <a href="http://www.sustainabletable.org/intro/whatis/">http://www.sustainabletable.org/intro/whatis/</a> (accessed on 27 June 2012).                                                                                                                                                                                                                             |       |            |
| Horne, J.E. Essential Steps to a Sustainable Agriculture. Available online: <a href="http://www.kerrcenter.com/HTML/steps.html">http://www.kerrcenter.com/HTML/steps.html</a> (accessed on 2 July 2012).                                                                                                                                                                                                                                                                              |       |            |
| Junkichi, M. Sustainable Agriculture, 2012. Available online: <a href="http://wwf.panda.org/about_our_earth/teacher_resources/webfieldtrips/sus_agriculture/">http://wwf.panda.org/about_our_earth/teacher_resources/webfieldtrips/sus_agriculture/</a> (accessed on 2 July 2012).                                                                                                                                                                                                    |       |            |
| Kassie, M.; Zikhali, P. <i>The contribution of sustainable agriculture and land management to sustainable development</i> ; Policy Analysis and Networks Branch, Division for Sustainable Development, United Nations Department: New York, NY, USA, 2009. Available Online: <a href="http://www.un.org/esa/dsd/resources/res_pdfs/publications/ib/no7.pdf">http://www.un.org/esa/dsd/resources/res_pdfs/publications/ib/no7.pdf</a> (accessed on 25 July 2012).                      |       |            |
| Kirchenamt der Evangelischen Kirche Deutschland; Sekretariat der Deutschen Bischofskonferenz. <i>Neuorientierung für eine nachhaltige Landwirtschaft: Ein Diskussionsbeitrag zur Lage der Landwirtschaft</i> ; Kirchenamt der Evangelischen Kirche in Deutschland: Hannover/Bonn, Germany, 2003. Available online: <a href="http://www.nachhaltigkeit.info/media/1294153811phpxOOD7y.pdf">http://www.nachhaltigkeit.info/media/1294153811phpxOOD7y.pdf</a> (accessed on 2 July 2012). |       |            |
| Loftas, T.; Ross, J.; Burles, D. <i>Dimensions of Need: An Atlas of Food and Agriculture</i> ; Food and Agriculture Organization of the United Nations: Rome, Italy, 1995.                                                                                                                                                                                                                                                                                                            |       |            |
| Monsanto. Sustainable Agriculture, Producing More. Conserving More. Improving Lives, 2012. Available online: <a href="http://www.monsanto.com/ourcommitments/pages/sustainable-agriculture.aspx">http://www.monsanto.com/ourcommitments/pages/sustainable-agriculture.aspx</a> (accessed on 2 July 2012).                                                                                                                                                                             |       |            |
| Müller, R. Wie Handle Ich Nachhaltig?-Beispiel: Nachhaltige Landwirtschaft, D@dalos-Internationaler UNESCO Bildungsserver für Demokratie, Friedens-und Menschenrechtserziehung, 2011. Available online: <a href="http://www.dadalos-d.org/nachhaltigkeit/grundkurs_2/landwirtschaft.htm">http://www.dadalos-d.org/nachhaltigkeit/grundkurs_2/landwirtschaft.htm</a> (accessed on 29 June 2012).                                                                                       |       |            |
| National Institute of Food and Agriculture (NIFA). Sustainable Agriculture, 2012. Available online: <a href="http://www.csrees.usda.gov/sustainableagriculture.cfm">http://www.csrees.usda.gov/sustainableagriculture.cfm</a> (accessed on 2 July 2012).                                                                                                                                                                                                                              |       |            |
| Sustainable Agriculture Initiative (SAI). Definition of Sustainable Agriculture, 2010. Available online: <a href="http://www.saiplatform.org/sustainable-agriculture/definition">http://www.saiplatform.org/sustainable-agriculture/definition</a> (accessed on 2 July 2012).                                                                                                                                                                                                         |       |            |
| Sustainable Agriculture Network. Our Standards, SAN Principles. Available online: <a href="http://sanstandards.org/sitio/subsections/display/7">http://sanstandards.org/sitio/subsections/display/7</a> (accessed on 15 October 2012).                                                                                                                                                                                                                                                |       |            |
| Sustainable Agriculture Research and Education Program (SAREP). <i>What is Sustainable Agriculture?</i> Available online: <a href="http://www.cce.cornell.edu/Ag/SustainableAgriculture/Documents/what%20is%20sustainable%20ag.pdf">http://www.cce.cornell.edu/Ag/SustainableAgriculture/Documents/what%20is%20sustainable%20ag.pdf</a> (accessed on 29 June 2012).                                                                                                                   |       |            |
| Sustainet. Grundlagen: Nachhaltige Landwirtschaft. Available online: <a href="http://www.sustainet.org/de/nachhaltigkeit.htm">http://www.sustainet.org/de/nachhaltigkeit.htm</a> (accessed on 28 November 2013).                                                                                                                                                                                                                                                                      |       |            |
| Syngenta Crop Protection. <i>Stewardship &amp; Sustainable Agriculture: Making it work</i> ; Syngenta Crop Protection: Basel, Switzerland, 2006.                                                                                                                                                                                                                                                                                                                                      |       |            |

**Table S1. Cont.**

| Reference                                                                                                                                                                                                                                                                                                                                                                                                                                                   | Focus | Discipline |
|-------------------------------------------------------------------------------------------------------------------------------------------------------------------------------------------------------------------------------------------------------------------------------------------------------------------------------------------------------------------------------------------------------------------------------------------------------------|-------|------------|
| <i>Grey Literature</i>                                                                                                                                                                                                                                                                                                                                                                                                                                      |       |            |
| Unilever. <i>Sustainable Development Overview 2009: Creating a Better Future Every Day</i> ; Unilever: London, UK; Rotterdam, the Netherlands, 2009.                                                                                                                                                                                                                                                                                                        |       |            |
| WWF. <i>WWF Position on Sustainable Agriculture and CAP Reforms</i> , WWF: Washington, DC, USA, 2008. Available online: <a href="http://www.lnvaa.info.nl/static/eng/files/2hash/d9/d9e7fc9dc1f3c4a8bde0df4ae43d8805dab5d2f6/Complete_WWF_position_agriculture_03_07_2008.pdf">http://www.lnvaa.info.nl/static/eng/files/2hash/d9/d9e7fc9dc1f3c4a8bde0df4ae43d8805dab5d2f6/Complete_WWF_position_agriculture_03_07_2008.pdf</a> (accessed on 15 June 2015). |       |            |

**Table S2.** Description of the categories of the sustainable agriculture framework.

| Category                 | Description                                                                                                                                                                                                                                                                                                                                                                                                                                                                                                                                                                                                                                      |
|--------------------------|--------------------------------------------------------------------------------------------------------------------------------------------------------------------------------------------------------------------------------------------------------------------------------------------------------------------------------------------------------------------------------------------------------------------------------------------------------------------------------------------------------------------------------------------------------------------------------------------------------------------------------------------------|
| <b>Goals</b>             |                                                                                                                                                                                                                                                                                                                                                                                                                                                                                                                                                                                                                                                  |
| <i>Overarching Goals</i> |                                                                                                                                                                                                                                                                                                                                                                                                                                                                                                                                                                                                                                                  |
| Ethics                   | Summarizes all statements that point out that those values that are broadly considered to be morally good have to be upheld and followed also in Sustainable Agriculture. Among these, the frequently mentioned values are stewardship, humaneness, solidarity, respecting human rights and priority of needs instead of greed.<br><i>"[H]umaneness to animals is an important, positive aspect of sustainable animal and mixed farming."</i> [1]<br><i>"Vorley (2002) defined agricultural sustainability as not only economic sustainability but also environmental, social and ethical sustainable sustainability."</i> [2]                   |
| Multifunctionality       | Summarizes all statements that point out that Sustainable Agriculture has to perform a variety of functions from different areas/dimensions simultaneously (see category group "goals" to see which functions it has to perform: production of food, environmental protection, providing income, etc.).<br><i>Sustainable agriculture is "one that is purposefully multifunctional and highly productive ..."</i> [3]<br><i>"[S]ustainability is visualised as the ability of agriculture to fulfil simultaneously a range of desirable objectives"</i> [4]                                                                                      |
| Safety                   | Summarizes all statements that call for Sustainable Agriculture to be of low or no risk to life and health of humans, animals and the environment in general. There should also be no risk to the economic situation of stakeholders.<br><i>"An international Working Group (Smyth &amp; Dumanski 1993) has viewed maintenance or enhancement of productivity, reduced risk, ... essential condition for sustainable land management"</i> [5]<br><i>"In industrialized country contexts, the challenges relate more to reducing costs, improving food safety, environmental amenities and nutritional values (World Bank 2008)."</i> [6]         |
| Stability & Resilience   | Summarizes all statements that point out that for Sustainable Agriculture agrifood systems or parts of them have to fulfill its functions in a reliable way, by being resistant to or by recovering quickly from shocks and disturbances and continuing for a long time.<br><i>"Sustainability in agricultural systems is viewed in terms of resilience (the capacity of systems to buffer shocks and stresses) and persistence (the capacity of systems to carry on)"</i> [7]<br><i>"In the agri-ruralist discourse, sustainability is directly linked to the family farm scale and, more specifically, to the continuity of the farm."</i> [8] |

Table S2. Cont.

| Category                                        | Description                                                                                                                                                                                                                                                                                                                                                                                                                                                                                                                                                                                                                                                                                                                                                                                                                                                                                                                                                                                                                                                                                                                                                                            |
|-------------------------------------------------|----------------------------------------------------------------------------------------------------------------------------------------------------------------------------------------------------------------------------------------------------------------------------------------------------------------------------------------------------------------------------------------------------------------------------------------------------------------------------------------------------------------------------------------------------------------------------------------------------------------------------------------------------------------------------------------------------------------------------------------------------------------------------------------------------------------------------------------------------------------------------------------------------------------------------------------------------------------------------------------------------------------------------------------------------------------------------------------------------------------------------------------------------------------------------------------|
| Goals                                           |                                                                                                                                                                                                                                                                                                                                                                                                                                                                                                                                                                                                                                                                                                                                                                                                                                                                                                                                                                                                                                                                                                                                                                                        |
| <i>Environmental Goals: Production-Specific</i> |                                                                                                                                                                                                                                                                                                                                                                                                                                                                                                                                                                                                                                                                                                                                                                                                                                                                                                                                                                                                                                                                                                                                                                                        |
| Ecological Soundness                            | <p>Summarizes all statements that point out that that Sustainable Agriculture must be environmentally or ecologically friendly in a physical sense.</p> <p>(This category is part of both the group “Environmental Goals: Production-Specific” and “Environmental Goals: Non-Production-Specific”)</p> <p><i>“Discussions of sustainable agriculture frequently define it as ‘ecologically sound, economically viable, and socially just,’ or some variant on that phrase.” [1]</i></p> <p><i>“[S]ustainable agricultural systems use ‘the best available technology’ in a balanced, well-managed, and environmentally responsible manner (Hess 1991).” [9]</i></p>                                                                                                                                                                                                                                                                                                                                                                                                                                                                                                                    |
| Ecosystem Function Conservation                 | <p>Summarizes all statements that emphasize that sustainable agriculture has to maintain the biological processes that sustain ecosystems and generate ecosystem services and benefits.</p> <p>Both this category and the category “Natural Resource Conservation” are actually components of the category “Productive Capacity”. They are kept as separate categories here, however, because they are mentioned very frequently in the examined literature and thus seem to be of great significance on their own. Having SAID that, it is worthwhile to assess differences in the significance of these categories, which would not be possible if they were incorporated into the overarching category “Productive Capacity”.</p> <p><i>“As a consequence, a crucial component of sustainability, as defined in terms of the resilience of an agricultural system to external stresses and shocks, is maintaining the environmental resources and ecological functions upon which the system depends.” [10]</i></p> <p><i>“We define sustainable agriculture as practices that meet current and future societal needs for food and fibre, for ecosystem services, ...” [11]</i></p> |
| Natural Resource Conservation                   | <p>Summarizes all statements that point out that Sustainable Agriculture has to conserve the natural resources, which agricultural production depends on.</p> <p><i>“sustainable agriculture involves the use of natural resources to satisfy changing human needs while maintaining or enhancing the natural resource base and avoiding environmental degradation (Firebaugh, 1990).” [12]</i></p> <p><i>“The main goals in sustainable agriculture are natural resources protection and improvement ...” [13]</i></p>                                                                                                                                                                                                                                                                                                                                                                                                                                                                                                                                                                                                                                                                |
| Productive Capacity                             | <p>Summarizes statements that emphasize that Sustainable Agriculture has to maintain the ability of agricultural systems to produce.</p> <p><i>“sustainable agriculture is defined as any collection of agricultural practices which leaves the productive potential of the resource base at least as great as it was when those practices were initiated.” [14]</i></p> <p><i>“Altieri (1989) defines sustainable agriculture as a system which should aim to maintain production in the long run...” [15]</i></p>                                                                                                                                                                                                                                                                                                                                                                                                                                                                                                                                                                                                                                                                    |

Table S2. Cont.

| Category                                            | Description                                                                                                                                                                                                                                                                                                                                                                                                                                                                                                                                                                                                                                                                                        |
|-----------------------------------------------------|----------------------------------------------------------------------------------------------------------------------------------------------------------------------------------------------------------------------------------------------------------------------------------------------------------------------------------------------------------------------------------------------------------------------------------------------------------------------------------------------------------------------------------------------------------------------------------------------------------------------------------------------------------------------------------------------------|
| Goals                                               |                                                                                                                                                                                                                                                                                                                                                                                                                                                                                                                                                                                                                                                                                                    |
| <i>Environmental Goals: Non-Production-Specific</i> |                                                                                                                                                                                                                                                                                                                                                                                                                                                                                                                                                                                                                                                                                                    |
| Ecological Soundness                                | <p>Summarizes all statements that point out that Sustainable Agriculture must be environmentally or ecologically friendly in a physical sense.</p> <p>(This category is part of both the group “Environmental Goals: Production-Specific” and “Environmental Goals: Non-Production-Specific”)</p> <p><i>“[A] sustainable agriculture must be ecologically sound, economically viable, and socially just (Ikerd 1992)” [16]</i></p> <p><i>“WWF is concerned with promoting sustainable agriculture, which is defined as ensuring the production of safe, affordable and healthy food and fibre in ways that are ecologically responsible, economically viable and socially equitable.” [17]</i></p> |
| Animal Well-Being                                   | <p>Summarizes all statements that point out that Sustainable Agriculture has to ensure the general health and happiness of animals, especially of farm animals. This includes, for example, living conditions and diet appropriate to the needs of the animals or a treatment that does not cause harm or suffering to the animals.</p> <p><i>“Sustainable agriculture is a way of raising food that is healthy for consumers and animals...” [18]</i></p> <p><i>“To be sustainable in the short term, cattle production systems must fulfil the requirements of ... minimum divergence from the welfare needs of the cattle.” [19]</i></p>                                                        |
| Env Conservation and Improvement                    | <p>Summary of all statements that call for the improvement or protection of the physical components of the space in which people, animals and plants live from (further) deterioration. Here, “environmental conservation” refers to the environment at large, in its importance for society as a whole.</p> <p><i>“Sustainable agriculture is defined as successful management of the resources of agriculture to satisfy changing human needs, to conserve the environment and increase biological resources (Karami and Mansoorabadi, 2008).” [20]</i></p> <p><i>“Nature and biodiversity are protected and enhanced.” [21]</i></p>                                                             |
| Harmony with Nature                                 | <p>Summarizes all statements that argue that Sustainable Agriculture has to be based on an attitude of care for and peaceful existence with and within nature. Also contains those statements that even claim that nature should be placed at the center of all considerations for sustainable agriculture (ecocentrism).</p> <p><i>“[M]otives to work within the natural order appear to allow the concept of sustainable agriculture to exist.” [22]</i></p> <p><i>“Alternative ideologies, such as those of organic agriculture, focus on the values underlying a vision of sustainability based on the preservation of an idyllic agrarian way of life: harmony with nature...” [4]</i></p>    |
| <i>Social Goals</i>                                 |                                                                                                                                                                                                                                                                                                                                                                                                                                                                                                                                                                                                                                                                                                    |
| Social Responsibility                               | <p>Summarizes all statements that emphasize that Sustainable Agriculture has to be carried out in a way that it benefits society at large and statements pointing out that sustainable agriculture has to be possible and livable for people working and living with it.</p> <p><i>“Sustainable agriculture seeks to achieve three main goals: economic efficiency, environmental quality and social responsibility.” [23]</i></p> <p><i>“A desirable end-point for both modern and pre-modern agricultural systems is clearly some design that enhances ... the public benefits through other functions.” [24]</i></p>                                                                            |

Table S2. Cont.

| Category                   | Description                                                                                                                                                                                                                                                                                                                                                                                                                                                                                                                                                                                                                            |
|----------------------------|----------------------------------------------------------------------------------------------------------------------------------------------------------------------------------------------------------------------------------------------------------------------------------------------------------------------------------------------------------------------------------------------------------------------------------------------------------------------------------------------------------------------------------------------------------------------------------------------------------------------------------------|
| <b>Goals</b>               |                                                                                                                                                                                                                                                                                                                                                                                                                                                                                                                                                                                                                                        |
| Acceptability              | <p>Summarizes statements arguing that Sustainable Agriculture has to be socially acceptable.</p> <p><i>“A major pre-requisite for attaining sustainable agricultural development ... is the formulation of appropriate renewable resource management policies which are supported by the farming communities and to which they are willing and able to respond (World Bank 1988, Odemerho 1992)” [25]</i></p> <p><i>“[E]nsure that the resulting farm practice is acceptable to the balance of aesthetic tastes.” [26]</i></p>                                                                                                         |
| Cultural Preservation      | <p>Summarizes all statements that emphasize that Sustainable Agriculture has to contribute to the preservation and enhancement of customs and beliefs, arts and aesthetics, way of life and forms of social organization in the rural space.</p> <p><i>“At the local level, agricultural sustainability is associated with ... promotion of local institutions, culture and farming communities.” [7]</i></p> <p><i>“[T]he three corner stones of sustainable agriculture ... rest upon a foundation of inter-generational equity which in turn has its foundation in human spirituality.” [15]</i></p>                                |
| Equity, Justice, Fairness  | <p>Summarizes all statements that point out that in and for Sustainable Agriculture, everybody has to be treated in a morally right way that does not favor one person over another.</p> <p><i>“Cai and Smith (1994) have also suggested that agricultural sustainability should be assessed from the perspectives of ecological soundness, social acceptability and economic viability. [...] ‘[S]ocial acceptability’ refers to self-reliance, equality and improved quality of life” [27]</i></p> <p><i>“[T]he three corner stones of sustainable agriculture ... rest upon a foundation of inter-generational equity” [15]</i></p> |
| Fulfillment of Human Needs | <p>Summarizes all statements that contend that it is one goal of Sustainable Agriculture to fulfill human needs in the present and the future.</p> <p><i>“Sustainable agriculture is defined as successful management of the resources of agriculture to satisfy changing human needs” [20]</i></p> <p><i>“Sustainable agriculture ... must be capable of meeting the needs of the present without compromising the future.” [28]</i></p>                                                                                                                                                                                              |
| Good Working Conditions    | <p>Summarizes all statements that claim that Sustainable Agriculture has to provide such work conditions that those who are occupied with it can continue working in agriculture for a long time.</p> <p><i>“Policies and programs are needed to address this problem, working toward socially just and safe employment that provides adequate wages, working conditions ...” [29]</i></p> <p><i>“Workers are treated fairly and paid competitive wages and benefits. They work in a safe environment and are offered proper living conditions and food.” [18]</i></p>                                                                 |
| Human Health               | <p>Summarizes statements that point out that Sustainable Agriculture has to ensure the protection and enhancement of the physical well-being of all people that get into contact with agriculture and its products.</p> <p><i>“ensure the health of workers, rural populations and consumers” [30]</i></p> <p><i>“Agriculture policy and investment will be smarter to focus on improved human health and access to nutrition, and not only on increasing food supply.” [31]</i></p>                                                                                                                                                   |

Table S2. Cont.

| Category              | Description                                                                                                                                                                                                                                                                                                                                                                                                                                                                                                                                                                                                                                                                                                                                      |
|-----------------------|--------------------------------------------------------------------------------------------------------------------------------------------------------------------------------------------------------------------------------------------------------------------------------------------------------------------------------------------------------------------------------------------------------------------------------------------------------------------------------------------------------------------------------------------------------------------------------------------------------------------------------------------------------------------------------------------------------------------------------------------------|
| <b>Goals</b>          |                                                                                                                                                                                                                                                                                                                                                                                                                                                                                                                                                                                                                                                                                                                                                  |
| Nourishment           | <p>Summarizes all statements arguing that Sustainable Agriculture has to provide sufficient amounts of food that supports human health at all times and to all people.</p> <p><i>“this paradigm has the backing of industry, and according to its advocates, no other form of agriculture could possibly feed the world—unarguably a vital prerequisite for an agricultural system claiming to be sustainable.”</i> [32]</p> <p><i>“Sustainable agriculture is fundamentally necessitated by the need to satisfying human food needs, which is to responsibly produce sufficient nutritious food to ensure food security.”</i> [33]</p>                                                                                                          |
| Quality of Life       | <p>Contains all statements that call for Sustainable Agriculture to provide self-fulfillment and a good quality of life, especially for those individuals involved in agriculture but also for society in general. More exactly, sustainable agriculture should contribute to "a good, happy human life [...] a life well lived, a life that is deeply satisfying, fruitful, and worthwhile" [34].</p> <p><i>“We also identified two other elements as critical parts of these women's alternative agriculture paradigm: quality family life and spirituality.”</i> [35]</p> <p><i>“[U]rban gardens allow residents of inner areas to experience the joy and satisfaction of producing nutritious food in their own neighborhoods.”</i> [36]</p> |
| Strong Communities    | <p>Summarizes all statements that argue that Sustainable Agriculture has to strengthen rural communities in their social relations and organization.</p> <p><i>“The main goals in sustainable agriculture are ... empowering of socioeconomic structure of rural communities (Shepherd, A. 1998).”</i> [13]</p> <p><i>“Sustainable agriculture is contrasted with market-driven economic growth in that it is explicitly concerned with “normative” values such as ... cohesive rural communities (Pretty 1995, 1).”</i> [37]</p>                                                                                                                                                                                                                |
| <b>Economic Goals</b> |                                                                                                                                                                                                                                                                                                                                                                                                                                                                                                                                                                                                                                                                                                                                                  |
| Economic Viability    | <p>Summarizes all statements that point out that Sustainable Agriculture also has to be able to be carried out and continued from an economic point of view. This implies that Sustainable Agriculture should be, among other things productive, competitive and profitable.</p> <p><i>“Another perspective on economic sustainability in agriculture focuses on the economic performance and viability of farming.”</i> [38]</p> <p><i>“[A]griculture is not sustainable unless it is profitable.”</i> [39]</p>                                                                                                                                                                                                                                 |
| Development           | <p>Summarizes all statements that point out that a Sustainable Agriculture has to contribute to the improvement of economic and living conditions of people, especially in the rural areas.</p> <p><i>“Rao and Rogers (2006) defined sustainable agriculture as a practice that meets current and long-term needs ... of society while maximizing net benefits through the conservation of resources to maintain ... long-term human development.”</i> [2]</p> <p><i>“[I]ntegrate the concept of agricultural sustainability into poverty reduction”</i> [7]</p>                                                                                                                                                                                 |
| Livelihood            | <p>Summarizes all statements that argue that Sustainable Agriculture has to provide the basis of sustenance for farmers, rural workers and their respective families.</p> <p><i>“The Food and Agricultural Organisation (FAO) of the United Nations has tried to offer a more specific description of sustainable agricultural as a development path in which resource use and environmental management are combined with ... secure livelihoods”</i> [40]</p> <p><i>“But no matter how elegant the system or how accomplished the farmer, no agriculture is sustainable if it’s not also ... able to provide a healthy family income”</i> [41]</p>                                                                                              |

Table S2. Cont.

| Category                           | Description                                                                                                                                                                                                                                                                                                                                                                                                                                                                                                                                                                                                                                                                                                                                                                                                                                                                                                                                                                                                                    |
|------------------------------------|--------------------------------------------------------------------------------------------------------------------------------------------------------------------------------------------------------------------------------------------------------------------------------------------------------------------------------------------------------------------------------------------------------------------------------------------------------------------------------------------------------------------------------------------------------------------------------------------------------------------------------------------------------------------------------------------------------------------------------------------------------------------------------------------------------------------------------------------------------------------------------------------------------------------------------------------------------------------------------------------------------------------------------|
| <b>Goals</b>                       |                                                                                                                                                                                                                                                                                                                                                                                                                                                                                                                                                                                                                                                                                                                                                                                                                                                                                                                                                                                                                                |
| Provision of Products              | <p>Summarizes all statements that state that sustainable agriculture has to produce different material and immaterial outputs (food, fibers, fuels, medicine, services...).</p> <p>Although a great amount of the statements summarized in this category calls for the production of food, this category is different from the category of nutrition. The production of food is a necessary but not a sufficient condition for guaranteeing the nutrition of all people and some authors alert that more attention should be paid to better nutrition (<i>i.e.</i>, better quality, diversity and distribution of the food) rather than to merely increasing absolute food production (e.g., [31]).</p> <p><i>“[A] cropping system is sustainable if it has an acceptable level of production of harvestable yield”</i> [42]</p> <p><i>“A ‘dark green’ approach to sustainability suggests priorities for agricultural systems that help to build important natural and social assets whilst producing more food.”</i> [7]</p> |
| Thriving Economy                   | <p>Summarizes all statements emphasizing that Sustainable Agriculture has to support a thriving economy in the rural space, <i>i.e.</i>, an economy that generates for example employment, growth and well-going rural businesses.</p> <p><i>“Economic development policies are needed that encourage more diversified agricultural production on family farms as a foundation for healthy economies in rural communities.”</i> [29]</p> <p><i>“This argument is also supported by Pretty et al. (2008), where the authors indicate that the best approach to analysing agricultural sustainability is to assess it through the lens of economic growth, environmental protection and social progress.”</i> [2]</p>                                                                                                                                                                                                                                                                                                            |
| <b>Strategies</b>                  |                                                                                                                                                                                                                                                                                                                                                                                                                                                                                                                                                                                                                                                                                                                                                                                                                                                                                                                                                                                                                                |
| <i>Adaptive Management</i>         |                                                                                                                                                                                                                                                                                                                                                                                                                                                                                                                                                                                                                                                                                                                                                                                                                                                                                                                                                                                                                                |
| Adaptation                         | <p>Summarizes all statements that indicate that all strategies and practices for Sustainable Agriculture have to be able to exist and be used in the context of the specific natural, social, economic, political, cultural etc. conditions of a specific spatial and temporal situation without causing problems.</p> <p><i>“[F]or agriculture to be sustainable it must be compatible with the socio- political environment within which it operates.”</i> [38]</p> <p><i>“[P]romoting agricultural sustainability may demand strengthened coevolutionary processes on the local level”</i> [43]</p>                                                                                                                                                                                                                                                                                                                                                                                                                         |
| Learning                           | <p>Summarizes all statements that emphasize that Sustainable Agriculture requires learning by agricultural stakeholders, especially joint/social learning.</p> <p><i>“A central principle about sustainable agriculture is that it must enshrine some of these new ways of learning about the world.”</i> [44]</p> <p><i>“The transition to sustainable agriculture, therefore, needs networks of farmers who can jointly engage in learning and experimentation.”</i> [45]</p>                                                                                                                                                                                                                                                                                                                                                                                                                                                                                                                                                |
| Management, Integration & Redesign | <p>Summarizes all statements that emphasize that Sustainable Agriculture has to be based on complex management, <i>i.e.</i>, handling production and other agriculture-related activities rather by finding alternative ways of organizing the systems (redesign) as well as using a variety of techniques and approaches (integration) than by applying solutions that appear simple but lead to problems themselves (e.g., to control pests, rather apply a complex and diversified crop rotation system than pesticides).</p> <p><i>“Sustainable agriculture ... emphasizes design and management procedures that work with natural processes”</i> [46]</p> <p><i>“Sustainable agriculture requires integrated, but not unitary, policy measures.”</i> [26]</p>                                                                                                                                                                                                                                                             |

Table S2. Cont.

| Category                      | Description                                                                                                                                                                                                                                                                                                                                                                                                                                                                                                                                                                                                                                     |
|-------------------------------|-------------------------------------------------------------------------------------------------------------------------------------------------------------------------------------------------------------------------------------------------------------------------------------------------------------------------------------------------------------------------------------------------------------------------------------------------------------------------------------------------------------------------------------------------------------------------------------------------------------------------------------------------|
| <b>Strategies</b>             |                                                                                                                                                                                                                                                                                                                                                                                                                                                                                                                                                                                                                                                 |
| Prevention                    | <p>Summarizes all statements that emphasize that for Sustainable Agriculture, problems have to be anticipated and their occurrence avoided, which also requires accounting for uncertainties.</p> <p><i>“Thereafter, we define ... two characteristics of sustainable agricultural systems: ‘prevention’ and ‘direct marketing’ [47]</i></p> <p><i>“[A]ppropriate resource use in sustainable agriculture should be rationalised in a manner which considers ... unanticipated problems.” [33]</i></p>                                                                                                                                          |
| Substitution                  | <p>Summarizes all statements that argue that for Sustainable Agriculture, the use of unsustainable technologies, resources, approaches etc. has to be replaced by the application of more sustainable ones.</p> <p><i>“In sustainable agricultural systems, there is ... a substitution of renewable sources or labor to the extent that is economically feasible.” [29]</i></p> <p><i>“Shallow sustainability focuses on efficiency and substitution strategies” [48]</i></p>                                                                                                                                                                  |
| <b>Cooperation</b>            |                                                                                                                                                                                                                                                                                                                                                                                                                                                                                                                                                                                                                                                 |
| Collaboration & Communication | <p>Summarizes all statements that call for enhanced and improved social interaction among and between the different agricultural stakeholder groups in the sense of exchange, coordination and joint action in order to realize Sustainable Agriculture.</p> <p><i>“The cultural basis of sustainability means accommodating to the interests of all relevant stakeholders in such a way that neighbouring farms co-ordinate management practices” [26]</i></p> <p><i>“Second, we need to put in place a supportive policy and governance environment, which enhances social capital and knowledge exchange (Pretty et al. 2011).” [49]</i></p> |
| Participation                 | <p>Summarizes all statements which point out that Sustainable Agriculture requires that agricultural stakeholders have a greater say in relevant decisions.</p> <p><i>“Local efforts to enhance political participation must therefore be part of sustainable agricultural strategies” [50]</i></p> <p><i>“It is important from a democratic point of view that farmers have a voice in formulating the long-term development of the agricultural sector, and in the process of political decision making.” [51]</i></p>                                                                                                                        |
| <b>Ecology-based Strategy</b> |                                                                                                                                                                                                                                                                                                                                                                                                                                                                                                                                                                                                                                                 |
| Diversification               | <p>Statements that call for the maintenance and enhancement of variety in many different aspects of Sustainable Agriculture such as species, varieties and breeds of domesticated plants and animals; products and production activities; sources of income; technologies; etc.</p> <p><i>“Diversification in this context should therefore imply not only a diversification of crops ... but also a diversification of other farm management skills and socio-institutional resources” [50]</i></p> <p><i>“Farmers and ranchers can boost their financial sustainability by using a greater diversity of marketing techniques” [52]</i></p>    |
| Ecological Principles         | <p>Summarizes all statements that claim that Sustainable Agriculture has to respect and apply principles of ecosystem functioning.</p> <p><i>“In practice this means, that the ecological farmer in order to design sustainable systems is an imitator of nature.” [47]</i></p> <p><i>“They attempt to develop a sustainable system for food production and consumption, based on the idea of the farm as a ... self-regulating ... whole” [53]</i></p>                                                                                                                                                                                         |



Table S2. Cont.

| Category                                       | Description                                                                                                                                                                                                                                                                                                                                                                                                                                                                                                                           |
|------------------------------------------------|---------------------------------------------------------------------------------------------------------------------------------------------------------------------------------------------------------------------------------------------------------------------------------------------------------------------------------------------------------------------------------------------------------------------------------------------------------------------------------------------------------------------------------------|
| Strategies                                     |                                                                                                                                                                                                                                                                                                                                                                                                                                                                                                                                       |
| <i>Economics-based Strategy</i>                |                                                                                                                                                                                                                                                                                                                                                                                                                                                                                                                                       |
| Capital Asset Maintenance                      | <p>Summarizes all statements that point out that sustainable agriculture has to strive for such a use of all kinds of capital assets (natural, social, human, <i>etc.</i>) that allows their conservation or even enhancement instead of their (mere) consumption.</p> <p><i>"This suggests that maintaining 'environmental capital' is at least a condition of sustainability."</i> [10]</p> <p><i>"Most attention tends to be given to the environmental dimension, including the reproduction of natural capital."</i> [54]</p>    |
| Demand-Orientation                             | <p>Summarizes all statements emphasizing that production and resource use have to be according to actual demand in Sustainable Agriculture.</p> <p><i>"In a soil fertility context, sustainable agriculture seeks to maintain the balance between nutrients being removed by crops or animal produce and inputs from fertilisers and nutrient recycling."</i> [39]</p> <p><i>"Sustainable Agriculture has to ... produce adequate quantities of good quality, safe food"</i> [55]</p>                                                 |
| Efficiency                                     | <p>Summarizes all statements that emphasize that Sustainable Agriculture - and especially its production - has to be carried out well without wasting any kind of resources.</p> <p><i>"This goal requires an efficient use of technology in a manner conducive to sustainability."</i> [15]</p> <p><i>"Sustainable agriculture in the utilitarian discourse is defined well within the limits of the market. The foremost concerns are cost-price efficiency"</i> [8]</p>                                                            |
| Quality-Orientation                            | <p>Summarizes all statements that emphasize that Sustainable Agriculture has to be quality-oriented, especially regarding its products.</p> <p><i>"Sustainable agriculture produces diverse forms of high quality foods, fibers and medicines."</i> [48]</p> <p><i>"To be sustainable, a farm must produce adequate yields of high quality"</i> [56]</p>                                                                                                                                                                              |
| <i>Holistic &amp; Complex Systems Thinking</i> |                                                                                                                                                                                                                                                                                                                                                                                                                                                                                                                                       |
| Long-Term Perspective                          | <p>Summarizes all statements emphasizing that a long-term perspective needs to be taken in considerations for Sustainable Agriculture.</p> <p><i>"With a view to the emphasis on the need for long term planning under the rubric of sustainability"</i> [57]</p> <p><i>"In the agricultural context this view seeks to balance long term agricultural sustainability with economic viability, reduction of environmental harm, and fulfilling public demands for food and landscape benefits derived from agriculture."</i> [58]</p> |
| Scale-Sensitivity                              | <p>Summarizes all statements that draw attention to the necessity of considering causes and effects on all relevant scales and choosing an appropriate scale for analysis and action for Sustainable Agriculture.</p> <p><i>"Technology matters most if it is affordable and if it is appropriate to scale and conditions."</i> [31]</p> <p><i>"Landscape-scale management holds significant potential for reducing off-site consequences of agriculture."</i> [11]</p>                                                               |
| Systemic Thinking                              | <p>Summarizes all statements that emphasize that Sustainable Agriculture needs systemic approaches and thinking, <i>i.e.</i>, being holistic and considering the various interdependencies, dynamics and interactions between the components of agricultural or agrifood systems.</p> <p><i>"The essentials are seeing the land a living system"</i> [59]</p> <p><i>"Hilistic [sic!] thinking in planning and execution of all aspects of sustainable agriculture; i.e., a systems approach."</i> [60]</p>                            |

Table S2. Cont.

| Category                       | Description                                                                                                                                                                                                                                                                                                                                                                                                                                                                                                                                                                                                                      |
|--------------------------------|----------------------------------------------------------------------------------------------------------------------------------------------------------------------------------------------------------------------------------------------------------------------------------------------------------------------------------------------------------------------------------------------------------------------------------------------------------------------------------------------------------------------------------------------------------------------------------------------------------------------------------|
| <b>Strategies</b>              |                                                                                                                                                                                                                                                                                                                                                                                                                                                                                                                                                                                                                                  |
| <i>Knowledge &amp; Science</i> |                                                                                                                                                                                                                                                                                                                                                                                                                                                                                                                                                                                                                                  |
| Innovation                     | Summarizes all statements that express that Sustainable Agriculture has to build on new, alternative and improved approaches and statements calling for (technological, political...) change.<br><i>"Sustainability needs perpetual novelty and adaptive performance."</i> [45]<br><i>"Successful sustainable farming futures are seen to be dependent on ... significant changes in the wider economic, social and institutional environment (Pierce, 1996: 228)."</i> [26]                                                                                                                                                     |
| Modern                         | Summarizes all statements that argue in favor of the application of knowledge, methods and achievements of modern times and science for Sustainable Agriculture.<br><i>"Sustainable agriculture ... calls for a cautious blending of traditional and modern farm practices"</i> [37]<br><i>"Sustainable intensification via smart inputs from lab knowledge"</i> [61]                                                                                                                                                                                                                                                            |
| Traditional                    | Statements arguing that Sustainable Agriculture requires the application of traditional and indigenous knowledge, methods and practices.<br><i>"Sustainable agriculture ... calls for a cautious blending of traditional and modern farm practices"</i> [37]<br><i>"Maximum use of internal resources, including indigenous knowledge and practices"</i> [27]                                                                                                                                                                                                                                                                    |
| <i>Subsidiarity</i>            |                                                                                                                                                                                                                                                                                                                                                                                                                                                                                                                                                                                                                                  |
| Decentralization               | Summarizes all statements that claim that Sustainable Agriculture has to be organized in a less centralized and concentrated way, which also implies smaller units.<br><i>"[I]t is also consistent with one of the core philosophical principles of sustainable agriculture, namely, the need for dispersed production"</i> [62]<br><i>"[A]lternative agriculturalists advocate smaller farm units and technology"</i> [63]                                                                                                                                                                                                      |
| Independence                   | Summarizes all statements that argue that systems of Sustainable Agriculture should be (more) independent, self-reliant, self-sufficient, autonomous etc. from various external economic factors.<br><i>"greater self-reliance for farmers and rural populations"</i> [2]<br><i>"Urban agriculture provides food security for urban residents by promoting self-sufficiency."</i> [36]                                                                                                                                                                                                                                           |
| Local/Regional                 | Summarizes all statements that argue that Sustainable Agriculture requires a greater focus on and strengthening of the local and regional level.<br><i>"Off the farm, consumers and grassroots activists are working to create local markets and farm policies that support sustainable practices."</i> [41]<br><i>"From a sustainability framework, the optimum policy is to consume food that is produced as locally as possible" (Lang and Rayner 2002: 36)."</i> [32]                                                                                                                                                        |
| <b>Fields of Action</b>        |                                                                                                                                                                                                                                                                                                                                                                                                                                                                                                                                                                                                                                  |
| <i>Agrifood System</i>         |                                                                                                                                                                                                                                                                                                                                                                                                                                                                                                                                                                                                                                  |
| Consumption                    | Summarizes all statements that point out that patterns of leading our lives and consuming need to be adapted in order to achieve a Sustainable Agriculture. Also includes suggestions in which ways these patterns would have to be changed.<br><i>"On one hand, sustainable agriculture draws vitality from its being an expression of some strongly held values and concerns: ... preferences for high-quality and healthy food"</i> [64]<br><i>"This view presupposes that future farming systems must accept these ecosystem-imposed limits on the number of people in the world and the lifestyle they can enjoy."</i> [58] |

Table S2. Cont.

| Category                                        | Description                                                                                                                                                                                                                                                                                                                                                                                                                                                                                                                                                                                                                                                                             |
|-------------------------------------------------|-----------------------------------------------------------------------------------------------------------------------------------------------------------------------------------------------------------------------------------------------------------------------------------------------------------------------------------------------------------------------------------------------------------------------------------------------------------------------------------------------------------------------------------------------------------------------------------------------------------------------------------------------------------------------------------------|
| <b>Strategies</b>                               |                                                                                                                                                                                                                                                                                                                                                                                                                                                                                                                                                                                                                                                                                         |
| Production                                      | <p>Summarizes suggestions for ways in which agricultural production should be carried out in a Sustainable Agriculture, especially relating to the quantities that agriculture should produce to be sustainable.</p> <p><i>“The products that are produced with sustainable agriculture are more diverse”</i> [65]</p> <p><i>“A growing world population makes it necessary to increase food production”</i> [8]</p>                                                                                                                                                                                                                                                                    |
| Supply Chain                                    | <p>Summarizes all suggestions for improving and rearranging the supply chain (here used for all parts of the supply chain excluding agricultural production and consumption, which are treated in own categories as they gain special attention in the literature) in order to facilitate sustainable agriculture.</p> <p><i>“Significantly reduce waste along the entire food chain.”</i> [31]</p> <p><i>“Sustainable farming ... employs marketing practices that reduce the distance between production and consumption locations (Ritchie 1994).”</i> [66]</p>                                                                                                                      |
| <i>Management &amp; Technological Solutions</i> |                                                                                                                                                                                                                                                                                                                                                                                                                                                                                                                                                                                                                                                                                         |
| Crops & Livestock                               | <p>Summarizes all statements that suggest that new types of crops and livestock as well as improved varieties and breeds of already used crops and animals are needed for Sustainable Agriculture.</p> <p><i>“Crop varieties with enhanced resistance or tolerance to insect pests and crop pathogens.”</i> [60]</p> <p><i>“Use of local and improved crop varieties and livestock breeds”</i> [67]</p>                                                                                                                                                                                                                                                                                 |
| Management Tools                                | <p>Summarizes all statements that suggest the application of certain general management tools in decision making at all levels in order to achieve Sustainable Agriculture, e.g., indicators, monitoring, planning, decision-support tools etc.</p> <p><i>“These decision-support tools are essential in guiding agriculture towards sustainability (Hansen. 1996).”</i> [68]</p> <p><i>“A key element for any policy document aiming to ensure the transition towards sustainable agriculture is the setting of suitable goals, with clear targets and indicators to measure the progress towards sustainable agriculture (Bell and Morse 1999; Stevenson and Lee 2001).”</i> [32]</p> |
| Resource Use                                    | <p>Summarizes all statements that suggest which kind of resources should be used in which way for Sustainable Agriculture.</p> <p><i>“Self-sufficiency through preferred use of on-farm or locally available “internal” resources to purchased “external” resources”</i> [69]</p> <p><i>“The upper end of the sustainability scale sees a sustainable approach to wool production as one that: ... does not rely on oil or oil-derived chemicals (such as pesticides and artificial fertilisers); recycles and reuses resources, uses renewable energy sources”</i> [70]</p>                                                                                                            |
| Technology & Practices                          | <p>Summarizes all statements that suggest which agricultural techniques and technologies should be used in which way in order to achieve Sustainable Agriculture.</p> <p><i>“[T]here is no need for any Luddite abandonment of technology as part of sustainable agriculture.”</i> [22]</p> <p><i>“Avoid the unnecessary use of agrochemical and other technologies that adversely impact on the environment and on human health”</i> [67]</p>                                                                                                                                                                                                                                          |
| <i>Social &amp; Environmental Challenges</i>    |                                                                                                                                                                                                                                                                                                                                                                                                                                                                                                                                                                                                                                                                                         |
| Emission-Reduction                              | <p>Summarizes statements that suggest that Sustainable Agriculture needs to reduce harmful emissions.</p> <p><i>“Reduce the ecological footprint of production, distribution and consumption practices. Thereby minimizing GHG emissions and soil and water pollution.”</i> [67]</p> <p><i>“These approaches ... are also less energy intensive and less polluting”</i> [71]</p>                                                                                                                                                                                                                                                                                                        |

Table S2. Cont.

| Category                                            | Description                                                                                                                                                                                                                                                                                                                                                                                                                                                                                                                                                                                                                                                                                                                                                                                                                                                                                              |
|-----------------------------------------------------|----------------------------------------------------------------------------------------------------------------------------------------------------------------------------------------------------------------------------------------------------------------------------------------------------------------------------------------------------------------------------------------------------------------------------------------------------------------------------------------------------------------------------------------------------------------------------------------------------------------------------------------------------------------------------------------------------------------------------------------------------------------------------------------------------------------------------------------------------------------------------------------------------------|
| <b>Strategies</b>                                   |                                                                                                                                                                                                                                                                                                                                                                                                                                                                                                                                                                                                                                                                                                                                                                                                                                                                                                          |
| Global Trends                                       | <p>Summarizes all statements pointing out that realizing Sustainable Agriculture requires addressing and adapting to global development trends (such as population growth or climate change).</p> <p><i>“While measures and policies need to be put in place to reduce gas emissions from the agricultural sector (e.g., more efficient farming practices, reduced input use), mitigation alone is not sufficient. There is a need to work on adaptation measures to reduce the vulnerability of the agricultural sector to climate change, as well as promote opportunities associated with climate change.”</i> [17]</p> <p><i>“A sustainable food production system must keep pace with increasing demands (domestic or global) for food, which are due to continued population increases and improvement in per capita income in less developed countries (Grigg, 1986; Crosson, 1992)”</i> [38]</p> |
| <i>Social &amp; Human Capital</i>                   |                                                                                                                                                                                                                                                                                                                                                                                                                                                                                                                                                                                                                                                                                                                                                                                                                                                                                                          |
| Knowledge, Education, Skills                        | <p>Summarizes all statements about use and improvement of knowledge, education and skills of farmers but also of consumers, policy makers, extension professionals etc. for Sustainable Agriculture.</p> <p><i>“provide technical assistance and capacity-building for ministries of agriculture and natural resource management”</i> [7]</p> <p><i>“In other words, human capital on the farm (and knowing how to stimulate that capital) is of primary importance.”</i> [23]</p>                                                                                                                                                                                                                                                                                                                                                                                                                       |
| Organization                                        | <p>Summarizes all statements that call for better organization of agricultural stakeholders for cooperation and representation of their interests.</p> <p><i>“Integral to this participation is strong organisation of the local peasantry.”</i> [50]</p> <p><i>“Since sustainable agriculture research and education is not 'business as usual,' research and Extension activities should include the following methodologies: ... (c) networking, coalition building”</i> [72]</p>                                                                                                                                                                                                                                                                                                                                                                                                                     |
| Research & Development                              | <p>Summarizes all statements about the kind of research and development that is needed for Sustainable Agriculture.</p> <p><i>“Reinforcing such analyses and examining forms of farming allowing for the joint sustainability of biodiversity and agricultural production require interdisciplinary research.”</i> [73]</p> <p><i>“We remain convinced that the question of the high labour cost for organic production can best be addressed in the long term through research.”</i> [62]</p>                                                                                                                                                                                                                                                                                                                                                                                                           |
| <i>Social, Political &amp; Economic Environment</i> |                                                                                                                                                                                                                                                                                                                                                                                                                                                                                                                                                                                                                                                                                                                                                                                                                                                                                                          |
| Accessibility                                       | <p>Summarizes all statements that point out that it is necessary to provide access for everybody to means of production, marketing and distribution and to "life support" (especially food and water) in order to achieve the goals of Sustainable Agriculture.</p> <p><i>“Conway and Barbier (1990) opined that farmers' access to appropriate knowledge, production inputs and commodity markets play influential roles in agricultural development.”</i> [12]</p> <p><i>“Clear tenure rights are necessary to promote equitable access to resources as well as sustainable management.”</i> [6]</p>                                                                                                                                                                                                                                                                                                   |
| Economic System                                     | <p>Summarizes all suggestions for improving and rearranging the way economic activities are carried out and goods and services are valued.</p> <p><i>“Sustainable agricultural development must be seen from a holistic perspective and more ecological economics principles need to be integrated into its practice.”</i> [74]</p> <p><i>“And it [sustainability] must be reinforced by market processes, such as pricing which reflects social and ecological costs of production and environmental values (Fairtrade Foundation, 2010).”</i> [59]</p>                                                                                                                                                                                                                                                                                                                                                 |

**Table S2. Cont.**

| Category              | Description                                                                                                                                                                                                                                                                                                                                                                                                                                                                                                                                                                                                                                                                                                                      |
|-----------------------|----------------------------------------------------------------------------------------------------------------------------------------------------------------------------------------------------------------------------------------------------------------------------------------------------------------------------------------------------------------------------------------------------------------------------------------------------------------------------------------------------------------------------------------------------------------------------------------------------------------------------------------------------------------------------------------------------------------------------------|
| Strategies            |                                                                                                                                                                                                                                                                                                                                                                                                                                                                                                                                                                                                                                                                                                                                  |
| Infrastructure        | Summarizes all statements that point out that Sustainable Agriculture needs an improved infrastructure (of various kinds) in rural spaces.<br><i>“Invest public resources in essential public goods, including innovation and infrastructure”</i> [6]<br><i>“Farmers in developing countries need ... better agricultural infrastructure”</i> [75]                                                                                                                                                                                                                                                                                                                                                                               |
| Investment            | Summarizes statements about investments needed for the realization of Sustainable Agriculture from both private and public sources.<br><i>“[M]ore sustainable systems will call for much greater public investment at global, regional and national levels aimed at expanding research and extension to underpin the shift to more sustainable systems.”</i> [6]<br><i>“These goals might be realised through farm structure expansions or technological investments.”</i> [33]                                                                                                                                                                                                                                                  |
| Policy & Institutions | Summarizes all suggestions for kinds of policies that should be applied and changes in the policy and institutional environment in order to achieve Sustainable Agriculture.<br><i>“Fundamental shifts in institutions, policies and incentives will be required in the search for, and broad adoption of, sustainable agricultural practices”</i> [11]<br><i>“Sustainable agriculture needs ... supportive external institutions”</i> [76]                                                                                                                                                                                                                                                                                      |
| Society               | Summarizes all statements that express that Sustainable Agriculture requires broad support of society, in moral, financial and other ways. Also includes claims for a changed society (regarding its organization, thinking, underlying values and roles of individuals) as such a change is often the precondition for support for Sustainable Agriculture.<br><i>“[S]ustainable agriculture requires a commitment to changing public policies, economic institutions, and social values.”</i> [29]<br><i>“Even so the successful implementation of alternative models of sustainable agriculture requires the support of a new social contract. between farmers, food processors/retailers, consumers and the state.”</i> [54] |

**Table S3.** Strength of the presence of each theme in the different clusters measured as indicator value (measures the statistical alliance of the themes to the different clusters). The shades of grey indicate the strength of the presence of a theme in each cluster (white: 0.00 to 0.09, light grey: 0.10 to 0.14, dark grey: 0.15 to 0.29, black: 0.30 and higher).

| Group | Theme                                  | Indicator value |       |       |       |       |       |
|-------|----------------------------------------|-----------------|-------|-------|-------|-------|-------|
|       |                                        | cl. 1           | cl. 2 | cl. 3 | cl. 4 | cl. 5 | cl. 6 |
| Goals | Economic                               | 0.21            | 0.17  | 0.03  | 0.11  | 0.21  | 0.11  |
|       | Environmental: Non-Production-Specific | 0.14            | 0.10  | 0.12  | 0.06  | 0.23  | 0.09  |
|       | Environmental: Production-Specific     | 0.18            | 0.15  | 0.04  | 0.07  | 0.21  | 0.12  |
|       | Overarching                            | 0.12            | 0.24  | 0.01  | 0.14  | 0.24  | 0.01  |
|       | Social                                 | 0.20            | 0.15  | 0.06  | 0.07  | 0.21  | 0.09  |

Table S3. Cont.

| Group            | Theme                                    | Indicator value |       |       |       |       |       |
|------------------|------------------------------------------|-----------------|-------|-------|-------|-------|-------|
|                  |                                          | cl. 1           | cl. 2 | cl. 3 | cl. 4 | cl. 5 | cl. 6 |
| Strategies       | Adaptive Management                      | 0.01            | 0.15  | 0.05  | 0.05  | 0.25  | 0.16  |
|                  | Co-operation                             | 0.00            | 0.02  | 0.01  | 0.08  | 0.15  | 0.13  |
|                  | Ecology-based                            | 0.00            | 0.12  | 0.07  | 0.03  | 0.33  | 0.05  |
|                  | Economics-based                          | 0.09            | 0.16  | 0.01  | 0.00  | 0.22  | 0.29  |
|                  | Holistic & Complex Systems Thinking      | 0.02            | 0.04  | 0.00  | 0.43  | 0.04  | 0.04  |
|                  | Knowledge & Science                      | 0.00            | 0.02  | 0.01  | 0.08  | 0.12  | 0.43  |
|                  | Subsidiarity                             | 0.00            | 0.02  | 0.06  | 0.16  | 0.30  | 0.08  |
| Fields of Action | Agri-Food System                         | 0.01            | 0.20  | 0.06  | 0.00  | 0.19  | 0.22  |
|                  | Management & Technological Solutions     | 0.01            | 0.12  | 0.13  | 0.19  | 0.21  | 0.21  |
|                  | Social & Environmental Challenges        | 0.00            | 0.00  | 0.06  | 0.02  | 0.10  | 0.16  |
|                  | Social & Human Capital                   | 0.00            | 0.01  | 0.01  | 0.10  | 0.22  | 0.38  |
|                  | Social, Political & Economic Environment | 0.01            | 0.04  | 0.01  | 0.08  | 0.23  | 0.33  |

## References

1. Appleby, M.C. Sustainable Agriculture is Humane, Humane Agriculture is Sustainable. *J. Agric. Environ. Ethics* **2005**, *18*, 293–303.
2. Dillon, E.J.; Hennessy, T.; Hynes, S. Assessing the sustainability of Irish agriculture. *Int. J. Agric. Sustain.* **2010**, *8*, 131–147.
3. Christianson, L.; Tyndall, J. Seeking a dialogue: a targeted technology for sustainable agricultural systems in the American Corn Belt. *Sustain. Sci. Prac. Policy* **2011**, *7*, 70–77.
4. Ferreyra, C. Emergy analysis of one century of agricultural production in the Rolling Pampas of Argentina. *Int. J. Agric. Resour. Gov. Ecol.* **2006**, *5*, 185–205.
5. Rasul, G.; Thapa, G.B. Sustainability Analysis of Ecological and Conventional Agricultural Systems in Bangladesh. *World Dev.* **2003**, *31*, 1721–1741.
6. FAO. *Towards the Future We Want*; FAO: Rome, Italy, 2012.
7. Agriculture and Natural Resources Team. *Agricultural Sustainability*; UK Department for International Development (DFID): London, UK, 2004. Available online: <http://dfid-agriculture-consultation.nri.org/summaries/wp12.pdf> (accessed on 29 June 2012).
8. Hermans, F.; Horlings, I.; Beers, P.J.; Mommaas, H. The Contested Redefinition of a Sustainable Countryside: Revisiting Frouws' Rurality Discourses. *Sociologia Ruralis* **2010**, *50*, 46–63.
9. Füsün Tatlıdil, F.; Boz, İ.; Tatlıdil, H. Farmers' perception of sustainable agriculture and its determinants: A case study in Kahramanmaraş province of Turkey. *Environ. Dev. Sustain.* **2009**, *11*, 1091–1106.
10. Barbier, E.B.; Markandya, A.; Pearce, D.W. Sustainable agricultural development and project appraisal. *Eur. Rev. Agric. Econ.* **1990**, *17*, 181–196.
11. Tilman, D.; Cassman, K.G.; Matson, P.A.; Naylor, R.; Polasky, S. Agricultural sustainability and intensive production practices. *Nature* **2002**, *418*, 671–677.

12. Kasem, S.; Thapa, G.B. Sustainable development policies and achievements in the context of the agriculture sector in Thailand. *Sustain. Dev.* **2012**, *20*, 98–114.
13. Afrous, A.; Abdollahzadeh, G. Assessing factors affecting on sustainability of agriculture a case of Dezful County, southwest Iran. *Aus. J. Basic Appl. Sci.* **2011**, *5*, 1444–1449.
14. Goodwin, N.R. Lessons for the world from US agriculture: Unbundling technology. *World Dev.* **1991**, *19*, 85–102.
15. Ogaji, J. Sustainable Agriculture in the UK. *Environ. Dev. Sustain.* **2005**, *7*, 253–270.
16. Huang, S.-M. The articulation of culture, agriculture, and the environment of Chinese in northern Thailand. *Ethnol.* **2005**, *44*, 1–11.
17. WWF. *WWF Position on Sustainable Agriculture and CAP Reforms*, WWF: Washington, DC, USA, 2008. Available online: [http://www.lnvaainfo.nl/static/eng/files/2hash/d9/d9e7fc9dc1f3c4a8bde0df4ae43d8805dab5d2f6/Complete\\_WWF\\_position\\_agriculture\\_03\\_07\\_2008.pdf](http://www.lnvaainfo.nl/static/eng/files/2hash/d9/d9e7fc9dc1f3c4a8bde0df4ae43d8805dab5d2f6/Complete_WWF_position_agriculture_03_07_2008.pdf) (accessed on 15 June 2015).
18. GRACE Communications Foundation. What is sustainable agriculture? Introduction to Sustainability. Available online: <http://www.sustainabletable.org/intro/whatis/> (accessed on 27 June, 2012).
19. Phillips, C.J.C.; Sorensen, J.T. Sustainability in cattle production systems. *J. Agric. Environ. Ethics* **1993**, *6*, 61–73.
20. Allahyari, M. Extensionists' Attitude toward Sustainable Agriculture in Iran. *J. Appl. Sci.* **2008**, *8*, 3761–3763.
21. Unilever. *Sustainable Development Overview 2009: Creating a Better Future Every Day*; Unilever London, UK, 2009.
22. Falvey, L. Agri-history and sustainable agriculture: A consideration of technology and ancient wisdom. *Asian Agri-History* **2003**, *7*, 279–294.
23. Legg, W.; Viatte, G. Farming systems for sustainable agriculture. *OECD Obs.* **2001**, *226/227*, 21–24. Available online: [http://www.oecdobserver.org/news/archivestory.php/aid/508/Farming\\_systems\\_for\\_sustainable\\_agriculture.html](http://www.oecdobserver.org/news/archivestory.php/aid/508/Farming_systems_for_sustainable_agriculture.html) (accessed on 15 June 2015).
24. Pretty, J.N. Can Sustainable Agriculture Feed Africa? New Evidence on Progress, Processes and Impacts. *Environ. Dev. Sustain.* **1999**, *1*, 253–274.
25. Chokor, B.A.; Odemerho, F.O. Land degradation assessment by small scale traditional African farmers and implications for sustainable conservation management. *Geoforum* **1994**, *25*, 145–154.
26. Cobb, D.; Dolman, P.; O'Riordan, T. Interpretations of sustainable agriculture in the UK. *Prog. Human Geogr.* **1999**, *23*, 209–235.
27. Lin, Z.; Zoebisch, M.A. Resource use and agricultural sustainability: Risks and consequences of intensive cropping in China. *J. Agric. Rural Dev. Tropics Subtropics Suppl.* **2006**, *86*, 1–204.
28. Ikerd, J.I. Sustainable Capitalism: A Matter of Ethics and Morality. *Problemy Ekorożwoju* **2008**, *3*, 13–22.
29. Feenstra, G.; Ingels, C.; Campbell, D. What is Sustainable Agriculture? 2012. Available online: <http://www.sarep.ucdavis.edu/sarep/about/def> (accessed on 2 August, 2012).
30. Walter, C.; Stützel, H. A new method for assessing the sustainability of land-use systems (I): Identifying the relevant issues. *Ecol. Econ.* **2009**, *68*, 1275–1287.

31. Giovanucci, D.; Scherr, S.; Nierenberg, D.; Hebebrand, C.; Shapiro, J.; Milder, J.; Wheeler, K. *Food and Agriculture: The Future of Sustainability: A Strategic Input to the Sustainable Development in the 21st Century (SD21) Project*; United Nations: New York, NY, USA, 2012. Available online: [http://www.un.org/esa/dsd/dsd\\_sd21st/21\\_pdf/agriculture\\_and\\_food\\_the\\_future\\_of\\_sustainability\\_web.pdf](http://www.un.org/esa/dsd/dsd_sd21st/21_pdf/agriculture_and_food_the_future_of_sustainability_web.pdf) (accessed on 25 July 2012).
32. Johnson, R.B. Sustainable agriculture: Competing visions and policy avenue. *Int. J. Sustain. Dev. World Ecol.* **2006**, *13*, 469–480.
33. Tey, Y.-S.; Li, E.; Bruwer, J.; Abdullah, A.M.; Cummins, J.; Radam, A.; Ismail, M.M.; Darham, S. Refining the definition of sustainable agriculture: An inclusive perspective from Malaysian vegetable sector **2012**, *6*, 379–396.
34. Gewirth, A. *Self-Fulfillment*; Princeton University Press: Princeton, NJ, USA, 2009.
35. Chiappe, M.B.; Butler Flora, C. Gendered Elements of the Alternative Agriculture Paradigm. *Rural Sociol.* **1998**, *63*, 372–393.
36. Peters, K.A. Creating a sustainable urban agriculture revolution. *J. Environ. Law Litig.* **2010**, *25*, 203–247.
37. Buckland, J. International obstacles to rural development: How neoliberal policies constrain competitive markets and sustainable agriculture. *Can. J. Dev. Stud.* **2006**, *27*, 9–24.
38. Yunlong, C.; Smit, B. Sustainability in agriculture: A general review. *Agric. Ecosyst. Environ.* **1994**, *49*, 299–307.
39. Culleton, N.; Tunney, H.; Coulter, B. Sustainability in Irish agriculture. *Irish Geogr.* **1994**, *27*, 36–47.
40. Lancker, E.; Nijkamp, P. A policy scenario analysis of sustainable agricultural development options: A case study for Nepal. *Impact Assess. Project Apprais.* **2000**, *18*, 111–124.
41. Earles, R.; Williams, P. Sustainable Agriculture: An Introduction; 2005. Available online: <http://www.hfcsd.org/webpages/rlivingston/files/sustagintro.pdf> (accessed on 4 December 2011).
42. Morse, S.; McNamara, N.; Acholo, M. Soils, souls and agricultural sustainability: The need for connection. *Int. J. Sustain. Dev.* **2004**, *7*, 410–432.
43. Saifi, B.; Drake, L. A coevolutionary model for promoting agricultural sustainability. *Ecol. Econ.* **2008**, *65*, 24–34.
44. Pretty, J.N. Sustainable agriculture, people and the resource base: impacts on food production. *Forum Dev. Stud.* **1997**, *1*, 7–32.
45. Pretty, J.N. Towards sustainable food and farming systems in industrialized countries. *Int. J. Agric. Resour. Gov. Ecol.* **2000**, *1*, 77–94.
46. MacRae, R.J.; Henning, J.; Hill, S.B. Strategies to overcome barriers to the development of sustainable agriculture in Canada: The role of agribusiness. *J. Agric. Environ. Ethics* **1993**, *6*, 21–51.
47. Dantsis, T.; Loumou, A.; Giourga, C. Organic Agriculture's Approach towards Sustainability; Its Relationship with the Agro-Industrial Complex, A Case Study in Central Macedonia, Greece. *J. Agric. Environ. Ethics* **2009**, *22*, 197–216.
48. Gold, M.V. Sustainable Agriculture: Definitions and Terms; 2007. Available online: <http://www.nal.usda.gov/afsic/pubs/terms/srb9902.shtml> (accessed on 18 June 2012).



49. Firbank, L.G. Commentary: Pathways to global sustainable agriculture. *Int. J. Agric. Sustain.* **2012**, *10*, 1–4.
50. Bebbington, A.J. Farmer knowledge, institutional resources and sustainable agricultural strategies: a case study from the eastern slopes of the Peruvian Andes. *Bull. Latin Am. Res.* **1990**, *9*, 203–228.
51. Horlings, I. Policy conditions for sustainable agriculture in the Netherlands. *Environmentalist* **1994**, *14*, 193–199.
52. Sustainable Agriculture Research and Education Program (SAREP). What is Sustainable Agriculture? Available online: <http://www.cce.cornell.edu/Ag/SustainableAgriculture/Documents/what%20is%20sustainable%20ag.pdf> (accessed on 29 June 2012).
53. Michelsen, J. Organic Farming in a Regulatory Perspective. The Danish Case. *Sociologia Ruralis* **2001**, *41*, 62–84.
54. Bowler, I. Developing sustainable agriculture. *Geography* **2002**, *87*, 205–212.
55. Filson, G.C. Demographic and farm characteristic differences in ontario farmers' views about sustainability policies. *J. Agric. Environ. Ethics* **1996**, *9*, 165–180.
56. Reganold, J.P.; Glover, J.D.; Andrews, P.K.; Hinman, H.R. Sustainability of three apple production systems. *Nature* **2001**, *410*, 926–930.
57. Blunden, G.; Cocklin, C.; Smith, W.; Moran, W. Sustainability: A view from the paddock. *New Zealand Geogr.* **1996**, *52*, 24–34.
58. Tait, J.; Morris, D. Sustainable development of agricultural systems: competing objectives and critical limits. *Futures* **2000**, *32*, 247–260.
59. Aikanathan, S.; Chenayah, S.; Sasekumar, A. Sustainable agriculture: A case study on the palm oil industry. *Malays. J. Sci.* **2011**, *30*, 66–75.
60. Duveck, D.N. Biotechnology is compatible with sustainable agriculture. *J. Agric. Environ. Ethics* **1995**, *8*, 112–125.
61. Levidow, L.; Birch, K.; Papaioannou, T. EU agri-innovation policy: two contending visions of the bio-economy. *Critical Policy Stud.* **2012**, *6*, 40–65.
62. Onwueme, I.C.; Borsari, B.; Leal Filho, W.D.S. An analysis of some paradoxes in alternative agriculture and a vision of sustainability for future food systems. *Int. J. Agric. Resour. Gov. Ecol.* **2008**, *7*, 199–210.
63. Beus, C.E.; Dunlap, R.E. Conventional Versus Alternative Agriculture: The Paradigmatic Roots of the Debate. *Rural Sociol.* **1990**, *55*, 590–616.
64. Buttel, F.H. The politics and policies of sustainable agriculture: Some concluding remarks. *Soc. Nat. Resour.* **1997**, *10*, 341–344.
65. Caviglia, J.L.; Kahn, J.R. Diffusion of Sustainable Agriculture in the Brazilian Tropical Rain Forest: A Discrete Choice Analysis. *Econ. Dev. Cult. Chang.* **2001**, *49*, 311–333.
66. Hiranandani, V. Sustainable agriculture in Canada and Cuba: A comparison. *Environ. Dev. Sustain.* **2010**, *12*, 763–775.
67. Koohafkan, P.; Altieri, M.A.; Gimenez, E.H. Green Agriculture: foundations for biodiverse, resilient and productive agricultural systems. *Int. J. Agric. Sustain.* **2012**, *10*, 61–75.

68. Bédanger, V.; Vanasse, A.; Parent, D.; Allard, G.; Pellerin, D. Development of agri-environmental indicators to assess dairy farm sustainability in Quebec, Eastern Canada. *Ecol. Indic.* **2012**, *23*, 421–430.
69. Webster, P. The Challenge of Sustainability at the Farm Level: Presidential Address. *J. Agric. Econ.* **1999**, *50*, 371–387.
70. Warmington, T. Local, low-impact fibres: Approaches to sustainability in Australian wool production. *Int. J. Environ. Cult. Econ. Soc. Sustain.* **2011**, *7*, 365–377.
71. Ramanjaneyulu, G.V. Adapting Smallholder Agriculture to Climate Change. *IDS Bull.* **2012**, *43*, 113–121.
72. Minarovic, R.E.; Mueller, J.P. North Carolina Cooperative Extension Service Professionals' Attitudes toward Sustainable Agriculture. *J. Ext.* **2000**, *38*, Article 1.
73. Mouysset, L.; Doyen, L.; Jiguet, F.; Allaire, G.; Leger, F. Bio economic modeling for a sustainable management of biodiversity in agricultural lands. *Ecol. Econ.* **2011**, *70*, 617–626.
74. Shi, T. Applying a holistic approach to agricultural sustainability research: A methodological synthesis of ecological economics and system dynamics. *J. Interdiscip. Econ.* **2004**, *16*, 77–93.
75. Loftas, T.; Ross, J.; Burles, D. *Dimensions of Need: An Atlas of Food and Agriculture*; Food and Agriculture Organization of the United Nations: Rome, Italy, 1995.
76. Pretty, J.N. Participatory learning for sustainable agriculture. *World Dev.* **1995**, *23*, 1247–1263.

© 2015 by the authors; licensee MDPI, Basel, Switzerland. This article is an open access article distributed under the terms and conditions of the Creative Commons Attribution license (<http://creativecommons.org/licenses/by/4.0/>).
